# Supplementary material
Source: PubMed Central journal article supplement (PMC3805065)
Supplement: CJN.00710113_CJN00710113SupplementaryData.pdf [file CJN.00710113_CJN00710113SupplementaryData.pdf]

Supplemental Table 1. Search strategy

- 
1. exp Renal Insufficiency, Acute/
  2. (acute renal failure\$ or acute kidney failure\$).tw.
  3. (arf or akf).tw.
  4. (acute renal insufficiency\$ or acute kidney insufficiency\$).tw.
  5. (acute tubular necrosis or ATN).tw.
  6. (acute kidney injur\$ or acute renal injur\$ or AKI).tw.
  7. or/1-6
  8. risk.tw
  9. injury.tw
  10. failure.tw
  11. and/8-10
  12. rifle.tw
  13. kidney disease.tw
  14. improving global outcomes.tw
  15. and/14-15
  16. kdigo.tw
  17. or/11-12
  18. or/15-16
  19. acute kidney injury network.tw
  20. or/17-19
  21. and/ 7&20
-

Supplemental Table 2. Harmonization of acute kidney injury (AKI) classification and staging system

| Stage   | RIFLE                                                | AKIN                                | KDIGO                                       |
|---------|------------------------------------------------------|-------------------------------------|---------------------------------------------|
| Stage 1 | <i>Risk</i><br><br>1.5 fold ↑ serum<br>creatinine    | 1.5-2.0 fold ↑ serum<br>creatinine  | 1.5-1.9 fold ↑ serum<br>creatinine          |
| Stage 2 | <i>Injury</i><br><br>2.0 fold ↑ serum<br>creatinine  | >2.0-3.0 fold ↑ serum<br>creatinine | 2.0-2.9 fold ↑ serum<br>creatinine          |
| Stage 3 | <i>Failure</i><br><br>3.0 fold ↑ serum<br>creatinine | >3.0 fold ↑ serum<br>creatinine     | ≥3.0 fold ↑ serum<br>creatinine or dialysis |

RIFLE, Risk, Injury, Failure, Loss, Endstage; AKIN, Acute Kidney Injury Network; KDIGO, Kidney Disease Improving Global Outcomes

Supplemental Table 3. Characteristics of the 312 studies according to definitions of acute kidney injury

|                                            | All studies<br>irrespective of<br>AKI definition | Studies using<br>KDIGO-equivalent<br>serum creatinine-<br>based criteria to<br>define AKI | Studies using other<br>biochemical, urine<br>output, or dialysis<br>requirement-based<br>criteria to define AKI | Studies using<br>administrative<br>diagnosis codes to<br>define AKI |
|--------------------------------------------|--------------------------------------------------|-------------------------------------------------------------------------------------------|-----------------------------------------------------------------------------------------------------------------|---------------------------------------------------------------------|
| No. studies                                |                                                  |                                                                                           |                                                                                                                 |                                                                     |
| All                                        | 312                                              | 154                                                                                       | 130                                                                                                             | 28                                                                  |
| Adults                                     | 269                                              | 130                                                                                       | 114                                                                                                             | 25                                                                  |
| Children                                   | 42                                               | 24                                                                                        | 15                                                                                                              | 3                                                                   |
| Adults and children                        | 1                                                | 0                                                                                         | 1                                                                                                               | 0                                                                   |
| No. subjects, median (interquartile range) |                                                  |                                                                                           |                                                                                                                 |                                                                     |
| All                                        | 1,848<br>(769-8,639)                             | 1,293<br>(662-7,594)                                                                      | 1,668<br>(798-5,068)                                                                                            | 33,688<br>(5,246-562,799)                                           |
| Adults                                     | 2,308<br>(929-10,751)                            | 2,076<br>(829-10,518)                                                                     | 2,083<br>(940-6,033)                                                                                            | 39,805<br>(5,731-681,730)                                           |
| Children                                   | 390<br>(172-1,128)                               | 253<br>(146-430)                                                                          | 526<br>(272-1,128)                                                                                              | 2,194<br>(831-9,903)                                                |
| Percentage of male subjects, mean (range)  |                                                  |                                                                                           |                                                                                                                 |                                                                     |
| All                                        | 64 (28-100)                                      | 63 (28-100)                                                                               | 65 (46-99)                                                                                                      | 59 (38-98)                                                          |
| Adults                                     | 65 (28-100)                                      | 65 (28-100)                                                                               | 67 (55-99)                                                                                                      | 59 (38-98)                                                          |
| Children                                   | 54 (46-79)                                       | 56 (49-79)                                                                                | 53 (46-59)                                                                                                      | 55 (53-56)                                                          |
| Age (in years), mean (range)               |                                                  |                                                                                           |                                                                                                                 |                                                                     |
| Adults                                     | 60.0 (23.0-80.3)                                 | 60.6 (25.5-80.3)                                                                          | 58.7 (23.0-78.0)                                                                                                | 63.7 (43.3-79.2)                                                    |
| Children                                   | 4.7 (0.0 <sup>s</sup> -13.0)                     | 4.7 (0.0 <sup>s</sup> -11.4)                                                              | 4.9 (0.0 <sup>s</sup> -9.1)                                                                                     | 5.9 (4.0-9.1)                                                       |
| No. of studies by                          |                                                  |                                                                                           |                                                                                                                 |                                                                     |
| <i>Clinical setting (%)</i>                |                                                  |                                                                                           |                                                                                                                 |                                                                     |
| Community-acquired                         | 19 (6%)                                          | 7 (5%)                                                                                    | 8 (6%)                                                                                                          | 4 (14%)                                                             |
| Critical care                              | 57 (18%)                                         | 41 (27%)                                                                                  | 15 (11%)                                                                                                        | 1 (4%)                                                              |
| Cardiac surgery                            | 96 (31%)                                         | 42 (27%)                                                                                  | 53 (41%)                                                                                                        | 1 (4%)                                                              |
| Trauma                                     | 13 (4%)                                          | 4 (3%)                                                                                    | 6 (5%)                                                                                                          | 3 (11%)                                                             |
| Heart failure                              | 3 (1%)                                           | 1 (1%)                                                                                    | 1 (1%)                                                                                                          | 1 (4%)                                                              |
| Hematology/oncology                        | 7 (2%)                                           | 3 (2%)                                                                                    | 3 (2%)                                                                                                          | 1 (4%)                                                              |

|                                           |           |           |           |           |
|-------------------------------------------|-----------|-----------|-----------|-----------|
| Nephrotoxins                              | 19 (6%)   | 4 (3%)    | 14 (11%)  | 1 (4%)    |
| Hospital-acquired, unspecified            | 98 (32%)  | 52 (34%)  | 30 (23%)  | 16 (57%)  |
| <i>Continent (%)</i>                      |           |           |           |           |
| Australia & New Zealand                   | 10 (3%)   | 9 (6%)    | 1 (1%)    | 0 (0%)    |
| Asia                                      | 44 (14%)  | 21 (14%)  | 20 (15%)  | 3 (10%)   |
| Europe                                    | 98 (32%)  | 51 (33%)  | 46 (35%)  | 1 (4%)    |
| America                                   | 153 (49%) | 70 (45%)  | 59 (45%)  | 24 (86%)  |
| Africa                                    | 2 (1%)    | 0 (0%)    | 2 (2%)    | 0 (0%)    |
| Multiple continents                       | 5 (2%)    | 3 (2%)    | 2 (2%)    | 0 (0%)    |
| <i>World zone* (%)</i>                    |           |           |           |           |
| Australia & New Zealand                   | 10 (3%)   | 9 (6%)    | 1 (1%)    | 0 (0%)    |
| Eastern Asia                              | 26 (8%)   | 17 (11%)  | 6 (5%)    | 3 (10%)   |
| Western Asia                              | 6 (2%)    | 2 (1%)    | 4 (3%)    | 0 (0%)    |
| Southern Asia                             | 8 (3%)    | 2 (1%)    | 6 (5%)    | 0 (0%)    |
| South East Asia                           | 4 (1%)    | 0 (0%)    | 4 (3%)    | 0 (0%)    |
| Eastern Europe                            | 3 (1%)    | 2 (1%)    | 1 (1%)    | 0 (0%)    |
| Western Europe                            | 26 (8%)   | 15 (10%)  | 11 (8%)   | 0 (0%)    |
| Northern Europe                           | 27 (9%)   | 12 (8%)   | 14 (11%)  | 1 (4%)    |
| Southern Europe                           | 35 (11%)  | 18 (11%)  | 17 (13%)  | 0 (0%)    |
| Multi-zone Europe                         | 7 (2%)    | 4 (3%)    | 3 (2%)    | 0 (0%)    |
| North America                             | 142 (45%) | 64 (42%)  | 54 (41%)  | 24 (86%)  |
| South America                             | 11 (3%)   | 6 (4%)    | 5 (3%)    | 0 (0%)    |
| North Africa                              | 1 (1%)    | 0 (0%)    | 1 (1%)    | 0 (0%)    |
| Western Africa                            | 1 (1%)    | 0 (0%)    | 1 (1%)    | 0 (0%)    |
| Multiple zones                            | 5 (2%)    | 3 (2%)    | 2 (2%)    | 0 (0%)    |
| <i>Latitude (%)</i>                       |           |           |           |           |
| North                                     | 288 (92%) | 138 (89%) | 122 (93%) | 28 (100%) |
| South                                     | 21 (7%)   | 15 (10%)  | 6 (5%)    | 0 (0%)    |
| North and South                           | 3 (1%)    | 1 (1%)    | 2 (2%)    | 0 (0%)    |
| <i>Country income classification† (%)</i> |           |           |           |           |

|                                                               |           |           |           |          |
|---------------------------------------------------------------|-----------|-----------|-----------|----------|
| Low income                                                    | 2 (1%)    | 1 (1%)    | 1 (1%)    | 0 (0%)   |
| Lower middle income                                           | 5 (2%)    | 1 (1%)    | 4 (3%)    | 0 (0%)   |
| Upper middle income                                           | 40 (13%)  | 20 (13%)  | 18 (14%)  | 2 (7%)   |
| High income                                                   | 258 (82%) | 130 (84%) | 103 (79%) | 25 (89%) |
| Not available                                                 | 7 (2%)    | 2 (1%)    | 4 (3%)    | 1 (4%)   |
| <i>Country total health expenditure, % of GDP<sup>‡</sup></i> |           |           |           |          |
| < 5                                                           | 19 (6%)   | 8 (5%)    | 10 (8%)   | 1 (4%)   |
| 5-10                                                          | 136 (44%) | 68 (45%)  | 63 (48%)  | 5 (17%)  |
| > 10                                                          | 150 (48%) | 76 (49%)  | 53 (41%)  | 21 (75%) |
| Not available                                                 | 7 (2%)    | 2 (1%)    | 4 (3%)    | 1 (4%)   |

AKI denotes acute kidney injury; KDIGO, Kidney Disease Improving Global Outcomes; GDP, gross domestic product; \*According to the United Nations geo-scheme classification; <sup>†</sup> According to the World Bank classification of income of countries; <sup>‡</sup> According to the World Health Organization; <sup>§</sup> Newborns.

Supplemental Table 4. Characteristics of the individual studies included in the meta-analysis

| Author          | Year | Country                             | Study design  | Population | Mean age, years | Men, % | Study setting                            | Study setting reclassification | Study AKI definition                                               | Study AKI definition reclassification  | Total No. patients | No. patients with AKI | No. patients with R or stage-1 AKI | No. patients with I or stage-2 AKI | No. patients with F or stage-3 AKI | No. patients requiring RRT | Newcastle-Ottawa quality score |
|-----------------|------|-------------------------------------|---------------|------------|-----------------|--------|------------------------------------------|--------------------------------|--------------------------------------------------------------------|----------------------------------------|--------------------|-----------------------|------------------------------------|------------------------------------|------------------------------------|----------------------------|--------------------------------|
| Slocum (1)      | 2012 | USA                                 | Retrospective | Adults     | 70.0*           | 55*    | Cardiac catheterization                  | Nephrotoxins                   | Increase in sCr by $\geq 0.5$ mg/dL or $\geq 25\%$ from baseline   | Other clinical definition              | 47,480             | 4,308                 | -                                  | -                                  | -                                  | 177                        | 7                              |
| Ishikawa (2)    | 2012 | Canada                              | Retrospective | Adults     | 61.0            | 50     | Lung resection surgery                   | Hospital-acquired              | AKIN criteria                                                      | KDIGO-equivalent sCr-based definition  | 1,129              | 67                    | 59                                 | 8                                  | 0                                  | 1                          | 6                              |
| Lellouche (3)   | 2012 | Canada                              | Prospective   | Adults     | 65.3            | 73     | Cardiac surgery                          | Cardiac surgery                | Post-operative increase in sCr by $> 0.57$ mg/dL from baseline     | Other clinical definition              | 3,434              | 365                   | -                                  | -                                  | -                                  | 92                         | 8                              |
| Lamy (4)        | 2012 | UK, Canada, India, China, Argentina | Post-hoc RCT  | Adults     | 67.5            | 81     | Cardiac surgery                          | Cardiac surgery                | RIFLE criteria                                                     | KDIGO-equivalent sCr-based definition  | 4,752              | 1,235                 | 825                                | 306                                | 104                                | 55                         | 8                              |
| Chong (5)       | 2012 | Singapore                           | Retrospective | Adults     | 65.0            | 66     | Cardiac catheterization                  | Nephrotoxins                   | Increase in sCr by $\geq 0.5$ mg/dL or $\geq 25\%$ within 48 hours | Other clinical definition              | 770                | 88                    | -                                  | -                                  | -                                  | NR                         | 7                              |
| Wu (6)          | 2012 | Taiwan                              | Prospective   | Adults     | 60.8            | 67     | Surgical intensive care unit             | Critical care                  | RIFLE criteria                                                     | KDIGO-equivalent sCr-based definition  | 10,953             | 572                   | 151                                | 57                                 | 319                                | 572                        | 8                              |
| Arnaoutakis (7) | 2012 | USA                                 | Retrospective | Adults     | 52.0            | 82     | Left ventricular assist device           | Hospital-acquired              | Need for RRT                                                       | Other clinical definition              | 1,312              | 106                   | -                                  | -                                  | -                                  | 106                        | 7                              |
| Ried (8)        | 2012 | Germany                             | Retrospective | Adults     | 65.7            | 100    | Cardiac surgery                          | Cardiac surgery                | RIFLE criteria                                                     | KDIGO-equivalent sCr-based definition  | 3,139              | 98                    | -                                  | -                                  | -                                  | 62                         | 5                              |
| Thakar (9)      | 2012 | USA                                 | Retrospective | Adults     | 73.8            | 49     | Heart failure                            | Heart failure                  | ICD-9-CM diagnosis codes                                           | Administrative coding-based definition | 6,535              | 424                   | -                                  | -                                  | -                                  | -                          | 7                              |
| Bojan (10)      | 2012 | France                              | Retrospective | Children   | 0.3             | NR     | Cardiac surgery                          | Cardiac surgery                | AKIN criteria                                                      | KDIGO-equivalent sCr-based definition  | 958                | 244                   | -                                  | -                                  | -                                  | 79                         | 8                              |
| Selby (11)      | 2012 | UK                                  | Prospective   | Adults     | 80.0*           | NR     | Hospitalization                          | Hospital-acquired              | AKIN criteria                                                      | KDIGO-equivalent sCr-based definition  | 59,296             | 3,202                 | 1970                               | 638                                | 594                                | 90                         | 4                              |
| Amin (12)       | 2012 | USA                                 | Retrospective | Adults     | 68.9            | 59     | Acute myocardial infarction              | Hospital-acquired              | AKIN criteria                                                      | KDIGO-equivalent sCr-based definition  | 33,249             | 7,095                 | -                                  | -                                  | -                                  | -                          | 8                              |
| Wohlauer (13)   | 2012 | USA                                 | Prospective   | Adults     | 37.2            | 74     | Surgical intensive care unit             | Critical care                  | Increase in sCr to $\geq 1.8$ mg/dL within 48 hours                | Other clinical definition              | 2,158              | 154                   | -                                  | -                                  | -                                  | 36                         | 6                              |
| Ryden (14)      | 2012 | Sweden                              | Retrospective | Adults     | 65.5            | 80     | Cardiac surgery                          | Cardiac surgery                | AKIN criteria                                                      | KDIGO-equivalent sCr-based definition  | 7,594              | 1,047                 | 918                                | 108                                | 21                                 | -                          | 6                              |
| Patel (15)      | 2012 | USA                                 | Prospective   | Adults     | 72.0            | 68     | Cardiac surgery                          | Cardiac surgery                | AKIN criteria                                                      | KDIGO-equivalent sCr-based definition  | 1,139              | 407                   | -                                  | -                                  | -                                  | -                          | 6                              |
| Kim (16)        | 2012 | USA                                 | Retrospective | Adults     | 45.5            | 71     | Surgical intensive care unit             | Critical care                  | AKIN criteria                                                      | KDIGO-equivalent sCr-based definition  | 571                | 170                   | -                                  | -                                  | -                                  | -                          | 7                              |
| Zhou (17)       | 2012 | China                               | Retrospective | Adults     | 59.1            | 69     | Surgical and medical intensive care unit | Critical care                  | AKIN criteria                                                      | KDIGO-equivalent sCr-based definition  | 1,036              | 353                   | 161                                | 77                                 | 115                                | 73                         | 6                              |
| Parolari (18)   | 2012 | Italy                               | Retrospective | Adults     | 65.0            | 69     | Cardiac surgery                          | Cardiac surgery                | RIFLE criteria                                                     | KDIGO-equivalent sCr-based definition  | 3,219              | 288                   | -                                  | -                                  | -                                  | -                          | 5                              |
| Sims (19)       | 2012 | UK                                  | Retrospective | Adults     | 65.4            | 74     | Cardiac surgery                          | Cardiac surgery                | AKIN criteria                                                      | KDIGO-equivalent sCr-based definition  | 5,701              | 2,424                 | -                                  | -                                  | -                                  | 183                        | 6                              |

|                   |      |         |               |          |        |     |                                          |                    |                                                                                                                        |                                        |           |         |       |       |       |     |   |
|-------------------|------|---------|---------------|----------|--------|-----|------------------------------------------|--------------------|------------------------------------------------------------------------------------------------------------------------|----------------------------------------|-----------|---------|-------|-------|-------|-----|---|
| Candela-Toha (20) | 2012 | Spain   | Prospective   | Adults   | 66.1   | 59  | Cardiac surgery                          | Cardiac surgery    | RIFLE criteria                                                                                                         | KDIGO-equivalent sCr-based definition  | 2,103     | 300     | 178   | 77    | 45    | 72  | 6 |
| Mehrotra (21)     | 2012 | USA     | Retrospective | Adults   | NR     | 60  | Kidney Transplantation                   | Hospital-acquired  | ICD-9-CM diagnosis codes                                                                                               | Administrative coding-based definition | 27,232    | 3,066   | -     | -     | -     | 439 | 7 |
| Tóth (22)         | 2012 | Hungary | Prospective   | Children | 1.1    | NR  | Cardiac surgery                          | Cardiac surgery    | pRIFLE criteria                                                                                                        | KDIGO-equivalent sCr-based definition  | 1,510     | 481     | 173   | 26    | 282   | 96  | 9 |
| Libório (23)      | 2012 | Brazil  | Retrospective | Children | 5.0    | 53  | Visceral Leishmaniasis                   | Hospital-acquired  | pRIFLE                                                                                                                 | KDIGO-equivalent sCr-based definition  | 146       | 67      | 45    | 21    | 1     | -   | 7 |
| Ried (24)         | 2012 | Germany | Retrospective | Adults   | 78.0   | 50  | Cardiac surgery                          | Cardiac surgery    | Decrease in eGFR by $\geq 50\%$ or need for dialysis                                                                   | Other clinical definition              | 598       | 36      | -     | -     | -     | -   | 7 |
| Fox (25)          | 2012 | USA     | Retrospective | Adults   | 64.8   | 65  | Acute myocardial infarction              | Hospital-acquired  | Increase in sCr by 0.3- 0.5 mg/dL (mild), by 0.5-1.0 mg/dL (moderate), or $\geq 1.0$ mg/dL (severe)                    | KDIGO-equivalent sCr-based definition  | 59,970    | 9,659   | 3,919 | 3,363 | 2,377 | -   | 8 |
| Stewart (26)      | 2012 | USA     | Retrospective | Adults   | 25.5   | 98  | Burned military casualties               | Hospital-acquired  | RIFLE criteria                                                                                                         | KDIGO-equivalent sCr-based definition  | 692       | 165     | 97    | 36    | 32    | 41  | 7 |
| Garner (27)       | 2012 | UK      | Retrospective | Adults   | 61.0   | 50  | Hospitalization                          | Hospital-acquired  | AKIN criteria                                                                                                          | KDIGO-equivalent sCr-based definition  | 2,822     | 125     | 95    | 20    | 10    | -   | 9 |
| Craig (28)        | 2012 | UK      | Retrospective | Adults   | 34.0   | 48  | Severe acute liver injury                | Hospital-acquired  | need for RRT                                                                                                           | Other clinical definition              | 663       | 113     | -     | -     | -     | 113 | 7 |
| Colpaert (29)     | 2012 | Belgium | Prospective   | Adults   | 61.4   | 62  | Surgical and medical intensive care unit | Critical care      | RIFLE criteria                                                                                                         | KDIGO-equivalent sCr-based definition  | 951       | 527     | 172   | 266   | 89    | 55  | 8 |
| Tolpin (30)       | 2012 | USA     | Retrospective | Adults   | NR     | 76  | Cardiac surgery                          | Cardiac surgery    | Increase in sCr by $\geq 0.3$ mg/dL or $\geq 150\%$ from baseline                                                      | KDIGO-equivalent sCr-based definition  | 3,914     | 472     | -     | -     | -     | -   | 7 |
| Coca (31)         | 2012 | USA     | Prospective   | Adults   | 71.6   | 68  | Cardiac surgery                          | Cardiac surgery    | AKIN criteria                                                                                                          | KDIGO-equivalent sCr-based definition  | 1,159     | 409     | -     | -     | -     | 17  | 8 |
| Wehbe (32)        | 2012 | USA     | Retrospective | Adults   | 53     | 58  | Lung transplantation                     | Hospital-acquired  | AKIN criteria                                                                                                          | KDIGO-equivalent sCr-based definition  | 657       | 424     | 309   | 115   |       | 40  | 7 |
| Pedersen (33)     | 2012 | Denmark | Post-hoc RCT  | Children | 0.96   | 55  | Cardiac surgery                          | Cardiac surgery    | RIFLE criteria                                                                                                         | KDIGO-equivalent sCr-based definition  | 105       | 57      | 35    | 13    | 9     | 12  | 6 |
| Viswanathan (34)  | 2012 | USA     | Retrospective | Children | 0*     | 52* | Neonatal intensive care unit             | Critical care      | Increase in sCr to $> 1.5$ mg/dL within 72 hours or decrease in urine output to $< 1$ mL/kg/hour for at least 24 hours | Other clinical definition              | 472       | 59      | -     | -     | -     | -   | 6 |
| Blinder (35)      | 2012 | UK      | Retrospective | Children | 7 days | 56  | Cardiac surgery                          | Cardiac surgery    | Pediatric modified AKIN                                                                                                | KDIGO-equivalent sCr-based definition  | 430       | 225     | 135   | 59    | 31    | 153 | 7 |
| Han (36)          | 2012 | Korea   | Retrospective | Adults   | 68     | 60  | Intensive care unit                      | Critical care      | AKIN criteria                                                                                                          | KDIGO-equivalent sCr-based definition  | 1,625     | 827     | 548   | 100   | 179   | 143 | 7 |
| Haase (37)        | 2012 | Germany | Retrospective | Adults   | 66.7   | 73  | Cardiac surgery                          | Cardiac surgery    | RIFLE criteria                                                                                                         | KDIGO-equivalent sCr-based definition  | 920       | 179     | 179   | 64    | 20    | 40  | 6 |
| Kavaz (38)        | 2012 | Turkey  | Prospective   | Children | 3.8    | 58  | Intensive care unit                      | Critical care      | AKIN criteria                                                                                                          | KDIGO-equivalent sCr-based definition  | 189       | 63      | -     | -     | -     | 9   | 8 |
| Girman (39)       | 2012 | UK      | Retrospective | Adults   | 49.8   | 49  | General Practice                         | Community-acquired | READ diagnosis code                                                                                                    | Administrative coding-based definition | 1,914,482 | 119,966 | -     | -     | -     | -   | 6 |
| Brown (40)        | 2011 | USA     | Prospective   | Adults   | 66.2   | 70  | Cardiac surgery                          | Cardiac surgery    | Increase in sCr by $\geq 0.3$ mg/dL or $\geq 50\%$ from baseline or need for RRT                                       | Other clinical definition              | 4,987     | 1,723   | 1,350 | 242   | 132   | 32  | 9 |

|                        |      |             |               |          |      |      |                                               |                     |                                                                                  |                                        |         |       |       |       |     |     |   |
|------------------------|------|-------------|---------------|----------|------|------|-----------------------------------------------|---------------------|----------------------------------------------------------------------------------|----------------------------------------|---------|-------|-------|-------|-----|-----|---|
| Jiang (41)             | 2011 | China       | Retrospective | Adults   | NR   | NR   | Intensive care unit                           | Critical care       | AKIN criteria                                                                    | KDIGO-equivalent sCr-based definition  | 524     | 135   | -     | -     | -   | -   | 0 |
| Stallworth (42)        | 2011 | USA         | Retrospective | Children | 4.0  | 53   | Sickle cell disease                           | Hematology/Oncology | ICD-9-CM diagnosis codes                                                         | Administrative coding-based definition | 2,194   | 23    | -     | -     | -   | -   | 6 |
| Cartin-Ceba (43)       | 2011 | USA         | Retrospective | Adults   | 62.0 | 52   | Intensive care unit                           | Critical care       | RIFLE criteria                                                                   | KDIGO-equivalent sCr-based definition  | 1,461   | 4     | 1     | 1     | 2   | 1   | 7 |
| Thakar (44)            | 2011 | USA         | Retrospective | Adults   | 61.7 | 97   | Diabetes                                      | Community acquired  | AKIN criteria                                                                    | KDIGO-equivalent sCr-based definition  | 3,679   | 530   | 466   | 64    |     | -   | 9 |
| ACT Investigators (45) | 2011 | Brazil      | Post-hoc RCT  | Adults   | 68.0 | 61   | Post-intravascular angiographic procedure     | Nephrotoxins        | Increase in sCr by > 25% from baseline within 48-96 hours                        | Other clinical definition              | 2,308   | 289   | -     | -     | -   | 6   | 5 |
| Mitchell (46)          | 2011 | USA         | Prospective   | Adults   | 47.0 | 43   | Contrast-enhanced computed tomography imaging | Nephrotoxins        | Increase in sCr by > 0.5 mg/dL or > 25% from baseline within 2-7 days            | Other clinical definition              | 633     | 70    | -     | -     | -   | -   | 6 |
| Ried (47)              | 2011 | Germany     | Retrospective | Adults   | 78.0 | 54   | Cardiac surgery                               | Cardiac surgery     | RIFLE criteria                                                                   | KDIGO-equivalent sCr-based definition  | 598     | 323   | 196   | 98    | 29  | 36  | 7 |
| Wu (48)                | 2011 | Taiwan      | Prospective   | Adults   | 59.9 | 60   | Major surgery                                 | Hospital-acquired   | RIFLE criteria                                                                   | KDIGO-equivalent sCr-based definition  | 9,425   | 4,393 | 2,434 | 979   | 745 | 236 | 8 |
| Meier(49)              | 2011 | Switzerland | Retrospective | Adults   | 61.0 | 55   | Hospitalization                               | Hospital-acquired   | AKIN criteria                                                                    | KDIGO-equivalent sCr-based definition  | 104,272 | 4,296 | 1,742 | 1,578 | 976 | 976 | 7 |
| Lahoti (50)            | 2011 | USA         | Retrospective | Adults   | 59.0 | 56   | Intensive care unit                           | Critical care       | RIFLE criteria                                                                   | KDIGO-equivalent sCr-based definition  | 2,398   | 301   | 144   | 67    | 89  | 56  | 5 |
| Lu (51)                | 2011 | China       | Retrospective | Adults   | 60.8 | 65   | Hospitalization                               | Hospital-acquired   | AKIN criteria                                                                    | KDIGO-equivalent sCr-based definition  | 38,734  | 934   | -     | -     | -   | -   | 0 |
| Liu (52)               | 2011 | USA         | Post-hoc RCT  | Adults   | 49.8 | 54   | Acute lung injury                             | Hospital-acquired   | AKIN criteria                                                                    | KDIGO-equivalent sCr-based definition  | 1,000   | 814   | 541   | 123   | 150 | -   | 6 |
| Karkouti (53)          | 2011 | Canada      | Retrospective | Adults   | 62.7 | 75   | Cardiac surgery                               | Cardiac surgery     | RIFLE criteria                                                                   | KDIGO-equivalent sCr-based definition  | 12,388  | 256   | -     | -     | -   | -   | 7 |
| Mandelbaum (54)        | 2011 | USA         | Retrospective | Adults   | 65.8 | 58   | Intensive care unit                           | Critical care       | AKIN criteria                                                                    | KDIGO-equivalent sCr-based definition  | 14,524  | 8,272 | 5,595 | 2,046 | 631 | -   | 6 |
| Lombardi (55)          | 2011 | Spain       | Prospective   | Adults   | 59.0 | 61   | Mechanical ventilation                        | Critical care       | AKIN criteria                                                                    | KDIGO-equivalent sCr-based definition  | 2,783   | 803   | -     | -     | -   | -   | 7 |
| Barbosa(56)            | 2011 | Brazil      | Retrospective | Adults   | 62.6 | 33   | Cardiac surgery                               | Cardiac surgery     | Post-operative increase in sCr by $\geq$ 50% or post-operative need for dialysis | Other clinical definition              | 3,890   | 266   | -     | -     | -   | -   | 7 |
| Alkandari (57)         | 2011 | Canada      | Retrospective | Children | 5.8  | 56   | Intensive care unit                           | Critical care       | AKIN criteria                                                                    | KDIGO-equivalent sCr-based definition  | 2,106   | 377   | 206   | 91    | 80  | 30  | 7 |
| Wi (58)                | 2011 | Korea       | Retrospective | Adults   | 62.7 | 71.9 | Cardiac catheterization                       | Nephrotoxins        | Increase in sCr by > 25% or > 0.5 mg/dL within 48 hours                          | Other clinical definition              | 1,041   | 148   | -     | -     | -   | -   | 7 |
| Shlipak (59)           | 2011 | USA         | Prospective   | Adults   | 71.0 | 68   | Cardiac surgery                               | Cardiac surgery     | AKIN criteria                                                                    | KDIGO-equivalent sCr-based definition  | 1,147   | 407   | -     | -     | -   | -   | 9 |
| Piccinni (60)          | 2011 | Italy       | Prospective   | Adults   | 66.0 | 59   | Intensive care unit                           | Critical care       | RIFLE criteria                                                                   | KDIGO-equivalent sCr-based definition  | 576     | 379   | 205   | 99    | 75  | 48  | 9 |
| Clec'h (61)            | 2011 | France      | Prospective   | Adults   | 59.2 | 61   | Intensive care unit                           | Critical care       | RIFLE criteria                                                                   | KDIGO-equivalent sCr-based definition  | 8,639   | 2,846 | 1,025 | 830   | 991 | 545 | 7 |

|                     |      |                           |               |          |      |    |                                                         |                     |                                                                                                                                    |                                        |           |       |       |       |       |     |   |
|---------------------|------|---------------------------|---------------|----------|------|----|---------------------------------------------------------|---------------------|------------------------------------------------------------------------------------------------------------------------------------|----------------------------------------|-----------|-------|-------|-------|-------|-----|---|
| Budano (62)         | 2011 | Italy                     | Prospective   | Adults   | 66.0 | 73 | Cardiac catheterization                                 | Nephrotoxins        | Increase in sCr by $\geq$ 25% within 48 hours                                                                                      | Other clinical definition              | 755       | 120   | -     | -     | -     | -   | 7 |
| Pannu (63)          | 2011 | Canada                    | Retrospective | Adults   | 62.2 | 49 | Hospitalization                                         | Hospital-acquired   | AKIN criteria                                                                                                                      | KDIGO-equivalent sCr-based definition  | 43,008    | 7,856 | 5198  | 489   | 439   | -   | 8 |
| Türker (64)         | 2011 | Turkey                    | Retrospective | Children | 0.0  | 54 | Intensive care unit                                     | Critical care       | Increase in sCr to $>$ 1 mg/dL (for $\geq$ 33-week gestation) or $>$ 1.3 mg/dL (for $<$ 33-week gestation) within 48 hours of life | Other clinical definition              | 553       | 78    | -     | -     | -     | -   | 7 |
| Hwang (65)          | 2011 | Korea                     | Retrospective | Adults   | 63.7 | 69 | ST- and non-ST elevation myocardial infarction          | Hospital-acquired   | AKIN criteria                                                                                                                      | KDIGO-equivalent sCr-based definition  | 2,053     | 602   | 530   | 45    | 27    | -   | 5 |
| Zhong (66)          | 2011 | China                     | Prospective   | Children | 8.9  | NR | Renal disease                                           | Hospital-acquired   | AKIN criteria                                                                                                                      | KDIGO-equivalent sCr-based definition  | 95        | 33    | -     | -     | -     | 13  | 5 |
| Cho (67)            | 2011 | Korea                     | Retrospective | Adults   | 57.0 | 71 | Unilateral radical nephrectomy for renal cell carcinoma | Hematology/Oncology | RIFLE criteria                                                                                                                     | KDIGO-equivalent sCr-based definition  | 519       | 175   | 165   | 8     | 2     | -   | 6 |
| Pettila (68)        | 2011 | Australia and New Zealand | Prospective   | Adults   | 45.0 | 47 | Influenza (H1N1)                                        | Hospital-acquired   | RIFLE criteria                                                                                                                     | KDIGO-equivalent sCr-based definition  | 628       | 211   | 41    | 56    | 114   | 33  | 8 |
| Grams (69)          | 2011 | USA                       | Post-hoc RCT  | Adults   | 49.8 | 54 | Acute lung injury                                       | Hospital-acquired   | AKIN criteria                                                                                                                      | KDIGO-equivalent sCr-based definition  | 1,000     | 306   | 181   | 49    | 76    | 89  | 7 |
| van Kuijk (70)      | 2011 | The Netherlands           | Prospective   | Adults   | 67.9 | 76 | Vascular surgery                                        | Hospital-acquired   | RIFLE criteria                                                                                                                     | KDIGO-equivalent sCr-based definition  | 1,158     | 120   | 58    | 39    | 23    | -   | 6 |
| Licker (71)         | 2011 | Switzerland               | Retrospective | Adults   | 63.2 | 68 | Lung cancer surgery                                     | Hematology/Oncology | RIFLE criteria                                                                                                                     | KDIGO-equivalent sCr-based definition  | 1,345     | 91    | 56    | 33    | 2     | -   | 5 |
| Choi (72)           | 2011 | Korea                     | Retrospective | Adults   | 72.0 | 40 | Hospitalization                                         | Hospital-acquired   | ICD-10-CM diagnosis codes                                                                                                          | Administrative coding-based definition | 1,093,262 | 1156  | -     | -     | -     | -   | 7 |
| Martin-Loeches (73) | 2011 | Spain                     | Prospective   | Adults   | 43.0 | 55 | Intensive care unit (influenza A H1N1)                  | Critical care       | AKIN criteria                                                                                                                      | KDIGO-equivalent sCr-based definition  | 661       | 118   | 37    | 15    | 66    | 50  | 8 |
| Ishani (74)         | 2011 | USA                       | Retrospective | Adults   | 65.1 | 99 | Cardiac surgery                                         | Cardiac surgery     | Baseline-to-peak sCr increase by 1-24% (class I), 25-49% (class II), 50-99% (class III), or $\geq$ 100% (class IV)                 | Other clinical definition              | 29,388    | 9,410 | 5,357 | 2,719 | 1,334 | -   | 6 |
| Krawczeski (75)     | 2011 | USA                       | Prospective   | Children | 2.1  | 53 | Cardiac surgery                                         | Cardiac surgery     | AKIN                                                                                                                               | KDIGO-equivalent sCr-based definition  | 373       | 112   | -     | -     | -     | -   | 7 |
| Pompilio (76)       | 2011 | Italy                     | Retrospective | Adults   | 65.0 | 70 | Cardiac surgery                                         | Cardiac surgery     | Post-operative increase in sCr to 2.0 mg/dL and doubling of baseline pre-operative sCr                                             | Other clinical definition              | 5,818     | 457   | -     | -     | -     | 146 | 7 |
| Ali (77)            | 2011 | UK                        | Retrospective | Adults   | 74.5 | 54 | Outpatient database                                     | Community-acquired  | RIFLE criteria                                                                                                                     | KDIGO-equivalent sCr-based definition  | 523,390   | 474   | 117   | 251   | 194   | 48  | 7 |
| Mithani (78)        | 2011 | USA                       | Retrospective | Adults   | 66.0 | 99 | Cardiac surgery                                         | Cardiac surgery     | AKIN criteria                                                                                                                      | KDIGO-equivalent sCr-based definition  | 2,104     | 495   | -     | -     | -     | -   | 7 |
| Lin (79)            | 2011 | Taiwan                    | Retrospective | Adults   | NR   | 67 | Acute pancreatitis                                      | Hospital-acquired   | ICD-9-CM diagnosis codes                                                                                                           | Administrative coding-based definition | 1,734     | 261   | -     | -     | -     | -   | 8 |
| James (80)          | 2011 | Canada                    | Retrospective | Adults   | 63.1 | 72 | Coronary angiography                                    | Nephrotoxins        | AKIN criteria                                                                                                                      | KDIGO-equivalent sCr-based definition  | 14,782    | 1,420 | 1,099 | 321   | -     | -   | 6 |

|                   |      |                 |               |          |      |    |                                     |                    |                                                                                                         |                                        |         |        |       |       |       |       |   |
|-------------------|------|-----------------|---------------|----------|------|----|-------------------------------------|--------------------|---------------------------------------------------------------------------------------------------------|----------------------------------------|---------|--------|-------|-------|-------|-------|---|
| Englberger (81)   | 2011 | USA             | Retrospective | Adults   | 67.0 | 66 | Cardiac surgery                     | Cardiac surgery    | AKIN criteria                                                                                           | KDIGO-equivalent sCr-based definition  | 4,836   | 1,272  | 1,141 | 57    | 74    | 96    | 6 |
| Garzotto (82)     | 2011 | Italy           | Prospective   | Adults   | 66.0 | 59 | Intensive care unit                 | Critical care      | RIFLE criteria                                                                                          | KDIGO-equivalent sCr-based definition  | 576     | 379    | 205   | 99    | 75    | 48    | 8 |
| Moffett (83)      | 2011 | USA             | Retrospective | Children | NR   | NR | Hospitalization                     | Hospital-acquired  | pRIFLE criteria                                                                                         | KDIGO-equivalent sCr-based definition  | 1,660   | 561    | 441   | 117   | 3     | -     | 5 |
| Bolesta (84)      | 2011 | USA             | Retrospective | Adults   | 67.6 | 64 | Cardiac surgery                     | Cardiac surgery    | AKIN criteria                                                                                           | KDIGO-equivalent sCr-based definition  | 667     | 179    | -     | -     | -     | 9     | 6 |
| Noyez (85)        | 2011 | The Netherlands | Retrospective | Adults   | 66.0 | 71 | Cardiac surgery                     | Cardiac surgery    | Post-operative increase in sCr to 2.0 mg/dL and doubling of baseline pre-operative sCr                  | Other clinical definition              | 995     | 18     | -     | -     | -     | 13    | 6 |
| Huang (86)        | 2011 | Taiwan          | Prospective   | Adults   | 65.7 | 76 | Cardiac surgery                     | Cardiac surgery    | AKIN criteria                                                                                           | KDIGO-equivalent sCr-based definition  | 1,052   | 183    | -     | -     | -     | 50    | 9 |
| Du (87)           | 2011 | USA             | Prospective   | Children | 11.4 | 50 | Pediatric emergency center          | Community-acquired | pRIFLE criteria                                                                                         | KDIGO-equivalent sCr-based definition  | 252     | 18     | 12    | 6     | 0     | -     | 7 |
| Kimura (88)       | 2011 | Japan           | Retrospective | Adults   | 66.3 | 67 | Cardiac catheterization             | Nephrotoxins       | AKIN criteria                                                                                           | KDIGO-equivalent sCr-based definition  | 2,193   | 81     | -     | -     | -     | -     | 6 |
| de Geus (89)      | 2011 | The Netherlands | Prospective   | Adults   | 58.7 | 58 | Hospitalization                     | Hospital-acquired  | RIFLE criteria                                                                                          | KDIGO-equivalent sCr-based definition  | 632     | 171    | 67    | 48    | 56    | 28    | 6 |
| Li (90)           | 2011 | Taiwan          | Retrospective | Adults   | 68.9 | 82 | Cardiac surgery                     | Cardiac surgery    | AKIN criteria                                                                                           | KDIGO-equivalent sCr-based definition  | 964     | 186    | 74    | 33    | 79    | 68    | 5 |
| Fonseca Ruiz (91) | 2011 | USA             | Retrospective | Adults   | 52.6 | 53 | Intensive care unit                 | Critical care      | AKIN criteria                                                                                           | KDIGO-equivalent sCr-based definition  | 794     | 315    | 110   | 95    | 110   | 39    | 6 |
| Zappitelli (92)   | 2011 | USA             | Retrospective | Children | 8.0  | 51 | Aminoglycoside use                  | Nephrotoxins       | AKIN criteria                                                                                           | KDIGO-equivalent sCr-based definition  | 557     | 109    | 69    | 26    | 14    | -     | 7 |
| Paden (93)        | 2011 | USA             | Retrospective | Children | 0.02 | 50 | Extracorporeal membrane oxygenation | Critical care      | pRIFLE criteria                                                                                         | KDIGO-equivalent sCr-based definition  | 378     | 50     | 17    | 15    | 10    | 18    | 5 |
| Englberger (94)   | 2011 | USA             | Prospective   | Adults   | 59.0 | 71 | Elective thoracic aortic surgery    | Cardiac surgery    | RIFLE criteria                                                                                          | KDIGO-equivalent sCr-based definition  | 851     | 151    | 107   | 38    | 6     | 18    | 6 |
| Askenazi (95)     | 2011 | USA             | Retrospective | Children | 4.6  | 56 | Neonatal intensive care unit        | Critical care      | ICD-9-CM diagnosis codes                                                                                | Administrative coding-based definition | 9,903   | 1,040  | -     | -     | -     | 2,626 | 7 |
| Ostermann (96)    | 2011 | UK and Germany  | Prospective   | Adults   | NR   | NR | Intensive care unit                 | Critical care      | AKIN                                                                                                    | KDIGO-equivalent sCr-based definition  | 41,175  | 14,576 | 7,864 | 1,565 | 5,147 | -     | 4 |
| Amin (97)         | 2010 | USA             | Prospective   | Adults   | 61.3 | 67 | Acute myocardial infarction         | Hospital-acquired  | Increase in sCr by $\geq 0.3$ mg/dL from admission value                                                | KDIGO-equivalent sCr-based definition  | 2098    | 393    | -     | -     | -     | -     | 8 |
| Mehta (98)        | 2010 | USA             | Retrospective | Adults   | 65.0 | 69 | Cardiac surgery                     | Cardiac surgery    | Baseline-to-post-operative peak sCr increase by $> 50\%$ or $> 0.7$ mg/dL, or need for de novo dialysis | Other clinical definition              | 10,415  | 2,083  | -     | -     | -     | -     | 6 |
| Robert (99)       | 2010 | USA             | Prospective   | Adults   | 66.0 | 71 | Cardiac surgery                     | Cardiac surgery    | AKIN criteria                                                                                           | KDIGO-equivalent sCr-based definition  | 24,747  | 7,391  | 5,659 | 852   | 880   | -     | 8 |
| James (100)       | 2010 | Canada          | Prospective   | Adults   | 48.5 | 44 | Hospitalization                     | Hospital-acquired  | ICD-9-CM diagnosis codes                                                                                | Administrative coding-based definition | 920,985 | 6,520  | -     | -     | -     | 615   | 7 |

|                    |      |                                        |               |          |       |     |                                                                                           |                     |                                                                                                                   |                                        |           |         |        |        |        |     |   |
|--------------------|------|----------------------------------------|---------------|----------|-------|-----|-------------------------------------------------------------------------------------------|---------------------|-------------------------------------------------------------------------------------------------------------------|----------------------------------------|-----------|---------|--------|--------|--------|-----|---|
| Vannaphan (101)    | 2010 | Thailand                               | Retrospective | Adults   | 27.7  | 76  | Severe malaria                                                                            | Hospital-acquired   | sCr > 3 mg/dL, urine output < 400 mL/day                                                                          | Other clinical definition              | 915       | 195     | -      | -      | -      | 171 | 5 |
| Iglesias (102)     | 2010 | USA                                    | Prospective   | Adults   | 49.2  | 57  | Orthotopic liver transplantation                                                          | Hospital-acquired   | AKIN criteria                                                                                                     | KDIGO-equivalent sCr-based definition  | 688       | 243     | 178    | 45     | 20     | 6   | 9 |
| Silva Júnior (103) | 2010 | Brazil                                 | Retrospective | Adults   | 35.0  | 77  | AIDS                                                                                      | Hospital-acquired   | RIFLE criteria                                                                                                    | KDIGO-equivalent sCr-based definition  | 532       | 197     | 96     | 41     | 59     | -   | 5 |
| Brown (104)        | 2010 | USA                                    | Prospective   | Adults   | 66.2  | 70  | Cardiac surgery                                                                           | Cardiac surgery     | Increase in sCr by $\geq 0.3$ mg/dL or $\geq 50\%$ within 1-7 days                                                | KDIGO-equivalent sCr-based definition  | 4,987     | 1,886   | -      | -      | -      | -   | 9 |
| Yende (105)        | 2010 | USA                                    | Retrospective | Adults   | 67.2  | 52  | Community-acquired pneumonia                                                              | Hospital-acquired   | RIFLE criteria                                                                                                    | KDIGO-equivalent sCr-based definition  | 1,895     | 462     | 188    | 83     | 191    | -   | 7 |
| Hennessy (106)     | 2010 | USA                                    | Retrospective | Adults   | NR    | NR  | Cardiac surgery                                                                           | Cardiac surgery     | Increase in sCr to > 2.0 mg/dL and 2 times the preoperative sCr value, or post-operative requirement for dialysis | Other clinical definition              | 1,287     | 83      | -      | -      | -      | 43  | 6 |
| Fang (107)         | 2010 | China                                  | Retrospective | Adults   | NR    | 56  | Hospitalization                                                                           | Hospital-acquired   | Increase in sCr by $\geq 0.3$ mg/dL or $\geq 50\%$ within 48 hours                                                | KDIGO-equivalent sCr-based definition  | 11,923    | 5,619   | 4,185  | 776    | 658    | 317 | 6 |
| D'Onofrio (108)    | 2010 | Italy                                  | Retrospective | Adults   | 67.9  | 74  | Cardiac surgery                                                                           | Cardiac surgery     | RIFLE criteria                                                                                                    | KDIGO-equivalent sCr-based definition  | 2,488     | 584     | 228    | 248    | 108    | 32  | 7 |
| Coca (109)         | 2010 | USA                                    | Prospective   | Adults   | 66.1  | 97  | Diabetes and non-cardiac surgery                                                          | Hospital-acquired   | AKIN criteria                                                                                                     | KDIGO-equivalent sCr-based definition  | 35,302    | 6,257   | 5,109  | 760    | 388    | -   | 6 |
| Lafrance (110)     | 2010 | USA                                    | Retrospective | Adults   | 62.9  | 96  | Hospitalization                                                                           | Hospital-acquired   | Nadir-to-peak sCr ratio of $\geq 1.5$ during hospitalization                                                      | KDIGO-equivalent sCr-based definition  | 1,126,636 | 140,316 | 71,593 | 35,538 | 33,185 | -   | 7 |
| Ibrahim (111)      | 2010 | UK                                     | Retrospective | Adults   | 35.1  | 59  | Human immunodeficiency virus infection                                                    | Community-acquired  | > 40% decrease in eGFR or > 55% increase in sCr                                                                   | Other clinical definition              | 2,556     | 184     | -      | -      | -      | 83  | 7 |
| Ingraham (112)     | 2010 | United States, Canada, and Puerto Rico | Retrospective | Adults   | 46.2  | 65  | Severe trauma                                                                             | Trauma              | ICD-9-CM diagnosis codes                                                                                          | Administrative coding-based definition | 94,795    | 1,222   | -      | -      | -      | -   | 7 |
| Kwon (113)         | 2010 | Korea                                  | Prospective   | Adults   | 63.3* | 60* | Hospitalization                                                                           | Hospital-acquired   | AKIN criteria                                                                                                     | KDIGO-equivalent sCr-based definition  | 8,207     | 96      | 55     | 32     | 9      | 11  | 7 |
| Soto (114)         | 2010 | Portugal                               | Prospective   | Adults   | 59.1  | 63  | Emergency department                                                                      | Community-acquired  | AKIN criteria                                                                                                     | KDIGO-equivalent sCr-based definition  | 616       | 130     | 100    | -      | -      | 6   | 7 |
| Lahoti (115)       | 2010 | USA                                    | Retrospective | Adults   | 56.0  | 52  | Acute myelogenous leukemia (induction chemotherapy) or high-risk myelodysplastic syndrome | Hematology/Oncology | RIFLE criteria                                                                                                    | KDIGO-equivalent sCr-based definition  | 537       | 187     | 81     | 51     | 60     | -   | 6 |
| Bihorac (116)      | 2010 | USA                                    | Prospective   | Adults   | 42.5  | 62  | Trauma                                                                                    | Trauma              | RIFLE criteria                                                                                                    | KDIGO-equivalent sCr-based definition  | 982       | 253     | 106    | 79     | 68     | 29  | 8 |
| Fisher (117)       | 2010 | USA                                    | Retrospective | Children | 9.1   | 56  | Acute myeloid leukemia                                                                    | Hematology/Oncology | ICD-9-CM diagnosis codes                                                                                          | Administrative coding-based definition | 831       | 135     | -      | -      | -      | -   | 8 |
| Choi (118)         | 2010 | USA                                    | Retrospective | Adults   | 44.4  | 98  | Human immunodeficiency virus                                                              | Community-acquired  | AKIN criteria                                                                                                     | KDIGO-equivalent sCr-based definition  | 17,325    | 3,060   | 2,453  | 273    |        | 334 | 8 |
| Szczzech (119)     | 2010 | USA                                    | Retrospective | Adults   | 58.0  | 51  | Hypertensive urgency/emergency                                                            | Hospital-acquired   | RIFLE criteria                                                                                                    | KDIGO-equivalent sCr-based definition  | 1,566     | 363     | 241    | 65     | 57     | -   | 7 |

|                        |      |                        |               |          |       |     |                              |                    |                                                                                                                            |                                        |        |       |       |       |     |     |   |
|------------------------|------|------------------------|---------------|----------|-------|-----|------------------------------|--------------------|----------------------------------------------------------------------------------------------------------------------------|----------------------------------------|--------|-------|-------|-------|-----|-----|---|
| Akram (120)            | 2010 | UK                     | Prospective   | Adults   | 66.9  | 49  | Community-acquired pneumonia | Community-acquired | RIFLE criteria                                                                                                             | KDIGO-equivalent sCr-based definition  | 1,241  | 223   | 130   | 63    | 30  | 30  | 9 |
| Romano (121)           | 2010 | Italy                  | Retrospective | Adults   | 63.2  | 81  | Cardiac surgery              | Cardiac surgery    | RIFLE criteria                                                                                                             | KDIGO-equivalent sCr-based definition  | 1,034  | 391   | -     | -     | -   | 34  | 7 |
| Shema-Didi (122)       | 2010 | Israel                 | Retrospective | Adults   | 57.7  | NR  | Hospitalization              | Hospital-acquired  | RIFLE criteria                                                                                                             | KDIGO-equivalent sCr-based definition  | 25,800 | 1,943 | -     | -     | -   | 43  | 7 |
| Mitter (123)           | 2010 | USA                    | Prospective   | Adults   | 64.5  | 67  | Cardiac surgery              | Cardiac surgery    | RIFLE criteria                                                                                                             | KDIGO-equivalent sCr-based definition  | 9,461  | 424   | 112   | 52    | 260 | -   | 7 |
| Argalious (124)        | 2010 | USA                    | Retrospective | Adults   | 65.9  | 68  | Cardiac surgery              | Cardiac surgery    | RIFLE criteria                                                                                                             | KDIGO-equivalent sCr-based definition  | 10,648 | 1,286 | -     | -     | -   | 182 | 7 |
| Laoprasopwattana (125) | 2010 | Thailand               | Retrospective | Children | 9.1*  | 56* | Dengue hemorrhagic fever     | Hospital-acquired  | Increase in sCr to > 2 mg/dL or > 2.0-fold increase from baseline                                                          | Other clinical definition              | 2,893  | 25    | -     | -     | -   | 11  | 8 |
| Matheny (126)          | 2010 | USA                    | Retrospective | Adults   | NR    | 44  | Hospitalization              | Hospital-acquired  | RIFLE criteria                                                                                                             | KDIGO-equivalent sCr-based definition  | 26,107 | 2,078 | 1,352 | 726   | -   | -   | 6 |
| De Santo (127)         | 2010 | Italy                  | Prospective   | Adults   | 61.9  | 53  | Cardiac surgery              | Cardiac surgery    | RIFLE criteria                                                                                                             | KDIGO-equivalent sCr-based definition  | 1,424  | 606   | 492   | 98    | 16  | 65  | 7 |
| Santiago (128)         | 2010 | Spain                  | Prospective   | Children | 4.4   | 60  | Intensive care unit          | Critical care      | pRIFLE criteria                                                                                                            | KDIGO-equivalent sCr-based definition  | 174    | 73    | -     | -     | -   | -   | 5 |
| Gude (129)             | 2010 | Norway                 | Retrospective | Adults   | 50.0  | NR  | Heart transplantation        | Hospital-acquired  | Post-operative increase in sCr by $\geq 0.3$ mg/dL or $\geq 50\%$ within 7 days, or need for early post-operative dialysis | KDIGO-equivalent sCr-based definition  | 585    | 145   | -     | -     | -   | 71  | 5 |
| Morgan (130)           | 2010 | Australia              | Prospective   | Adults   | 61.2* | 68* | Intensive care unit          | Critical care      | RIFLE criteria                                                                                                             | KDIGO-equivalent sCr-based definition  | 2,379  | 228   | -     | -     | -   | 109 | 3 |
| Jyrala (131)           | 2010 | USA                    | Retrospective | Adults   | 66.3  | 66  | Cardiac surgery              | Cardiac surgery    | Post-operative increase in sCr to > 2.25 mg/dL regardless of the need for dialysis support                                 | Other clinical definition              | 885    | 79    | -     | -     | -   | 22  | 7 |
| Ahmed (132)            | 2010 | USA                    | Retrospective | Adults   | 78.4  | 38  | Hospitalization              | Hospital-acquired  | ICD-9-CM diagnosis codes                                                                                                   | Administrative coding-based definition | 3,656  | 371   | -     | -     | -   | -   | 5 |
| Schneider (133)        | 2010 | USA                    | Retrospective | Children | 0.6   | 54  | Intensive care unit          | Critical care      | RIFLE criteria                                                                                                             | KDIGO-equivalent sCr-based definition  | 3,396  | 339   | 111   | 101   | 127 | -   | 8 |
| Lafrance (134)         | 2010 | Canada                 | Retrospective | Adults   | 69.8  | 54  | Chronic kidney disease       | Community-acquired | Decrease in eGFR by $\geq 25\%$ and > 5 mL/min/1.73 m <sup>2</sup> from baseline                                           | Other clinical definition              | 6,862  | 3,079 | -     | -     | -   | -   | 8 |
| Uchino (135)           | 2010 | Australia              | Retrospective | Adults   | 67.2  | 55  | Hospitalization              | Hospital-acquired  | RIFLE criteria                                                                                                             | KDIGO-equivalent sCr-based definition  | 20,126 | 3,641 | 1,837 | 1,055 | 749 | 224 | 7 |
| Hsu (136)              | 2010 | Taiwan                 | Prospective   | Adults   | 65.9  | 77  | Hepatocellular carcinoma     | Hospital-acquired  | Decrease in eGFR to < 60 mL/min/1.73m <sup>2</sup>                                                                         | Other clinical definition              | 566    | 134   | -     | -     | -   | -   | 6 |
| Kong (137)             | 2010 | China                  | Prospective   | Adults   | 65.0  | 60  | Ischemic stroke              | Hospital-acquired  | ICD-9-CM diagnosis codes                                                                                                   | Administrative coding-based definition | 2,774  | 21    | -     | -     | -   | -   | 6 |
| Gordon (138)           | 2010 | Canada, Australia, USA | Post-hoc RCT  | Adults   | 60.4  | 61  | Septic shock                 | Hospital-acquired  | RIFLE criteria                                                                                                             | KDIGO-equivalent sCr-based definition  | 778    | 464   | 106   | 130   | 179 | 247 | 6 |
| Ferreira (139)         | 2010 | Portugal               | Retrospective | Adults   | 44.0  | 64  | Liver transplantation        | Hospital-acquired  | RIFLE criteria                                                                                                             | KDIGO-equivalent sCr-based definition  | 708    | 235   | 119   | 60    | 56  | 73  | 7 |

|                   |      |                    |               |          |       |     |                                                           |                   |                                                                                                 |                                        |           |        |        |       |       |        |   |
|-------------------|------|--------------------|---------------|----------|-------|-----|-----------------------------------------------------------|-------------------|-------------------------------------------------------------------------------------------------|----------------------------------------|-----------|--------|--------|-------|-------|--------|---|
| Heise (140)       | 2010 | Germany            | Retrospective | Adults   | 65.2  | NR  | Cardiac surgery                                           | Cardiac surgery   | need for RRT                                                                                    | Other clinical definition              | 3,508     | 383    | -      | -     | -     | 383    | 8 |
| Hsu (141)         | 2010 | Taiwan             | Retrospective | Adults   | 66.0  | 77  | Hepatocellular carcinoma, transarterial chemoembolization | Nephrotoxins      | Increase in sCr by $\geq 50\%$ or $\geq 0.5$ mg/dL to 1.5 mg/dL within 7 days                   | Other clinical definition              | 591       | 11     | -      | -     | -     | -      | 7 |
| Thakar (142)      | 2009 | USA                | Retrospective | Adults   | NR    | 98  | Intensive care unit                                       | Critical care     | Increase of serum creatinine by 0.3 mg/dL from baseline                                         | KDIGO-equivalent sCr-based definition  | 325,395   | 71,486 | 57,126 | 7,934 | 6,426 | 3,140  | 7 |
| Rodrigues (143)   | 2009 | Brazil             | Prospective   | Adults   | 57.0  | 54  | Cardiac surgery                                           | Cardiac surgery   | Post-operative increase in sCr by $\geq 50\%$ regardless of post-operative dialysis requirement | Other clinical definition              | 769       | 78     | -      | -     | -     | 18     | 6 |
| Lau (144)         | 2009 | Australia          | Prospective   | Adults   | 63.7  | 65  | Acute coronary syndrome                                   | Hospital-acquired | Increase in sCr by $> 0.57$ mg/dL from baseline                                                 | Other clinical definition              | 3,393     | 15     | -      | -     | -     | -      | 7 |
| Yan (145)         | 2009 | China              | Retrospective | Adults   | 56.2  | 96  | Cardiac surgery                                           | Cardiac surgery   | RIFLE criteria                                                                                  | KDIGO-equivalent sCr-based definition  | 509       | 167    | 108    | 25    | 34    | -      | 6 |
| Machado (146)     | 2009 | Brazil             | Retrospective | Adults   | 61.0  | 70  | Cardiac surgery                                           | Cardiac surgery   | Increase in sCr by $\geq 0.3$ mg/dL or $\geq 50\%$ from baseline                                | KDIGO-equivalent sCr-based definition  | 817       | 396    | -      | -     | -     | 31     | 5 |
| Li (147)          | 2009 | China              | Prospective   | Adults   | 56.6* | 62* | Hospitalization                                           | Hospital-acquired | Increase in sCr to $> 2.0$ mg/dL or $\geq 50\%$                                                 | Other clinical definition              | 108,744   | 320    | -      | -     | -     | 95     | 8 |
| Slankamenac (148) | 2009 | Switzerland        | Retrospective | Adults   | 57.2  | 55  | Liver resection                                           | Hospital-acquired | RIFLE criteria                                                                                  | KDIGO-equivalent sCr-based definition  | 569       | 86     | -      | -     | -     | 5      | 7 |
| Wu (149)          | 2009 | Taiwan             | Retrospective | Children | 7.28  | 79  | Rhabdomyolysis                                            | Hospital-acquired | RIFLE criteria                                                                                  | KDIGO-equivalent sCr-based definition  | 172       | 15     | -      | -     | -     | 5      | 7 |
| Stamou (150)      | 2009 | USA                | Retrospective | Adults   | 62.9  | 73  | Cardiac surgery                                           | Cardiac surgery   | Post-operative increase in sCr to $> 2.0$ mg/dL and $>$ twice the pre-operative sCr value       | Other clinical definition              | 2,101     | 151    | -      | -     | -     | 42     | 7 |
| Saddadi (151)     | 2009 | Iran               | Prospective   | Adults   | 23.0  | NR  | Hematopoietic cell transplantation                        | Hematology/Onco   | Doubling of sCr                                                                                 | Other clinical definition              | 1,693     | 22     | -      | -     | -     | -      | 7 |
| Cartin-Ceba (152) | 2009 | USA                | Retrospective | Adults   | 66.0  | 54  | Intensive care unit                                       | Critical care     | RIFLE criteria                                                                                  | KDIGO-equivalent sCr-based definition  | 11,644    | 5,738  | 3,347  | 1,326 | 686   | 1,065  | 6 |
| Amdur (153)       | 2009 | USA                | Retrospective | Adults   | 70.8  | 98  | Hospitalization                                           | Hospital-acquired | ICD-9-CM diagnosis codes                                                                        | Administrative coding-based definition | 147,226   | 21,536 | -      | -     | -     | -      | 8 |
| Nicoara (154)     | 2009 | USA                | Retrospective | Adults   | NR    | NR  | Cardiac surgery                                           | Cardiac surgery   | need for RRT                                                                                    | Other clinical definition              | 7,339,520 | 30,033 | -      | -     | -     | 30,033 | 5 |
| Soltani (155)     | 2009 | USA                | Retrospective | Adults   | 31.0  | NR  | Burn                                                      | Hospital-acquired | need for RRT                                                                                    | Other clinical definition              | 3356      | 33     | -      | -     | -     | 33     | 7 |
| Costantini (156)  | 2009 | USA                | Retrospective | Adults   | 45.5  | 71  | Surgical intensive care unit                              | Critical care     | AKIN criteria                                                                                   | KDIGO-equivalent sCr-based definition  | 571       | 170    | 146    | 15    | 9     | 12     | 8 |
| De Santo (157)    | 2009 | Italy              | Prospective   | Adults   | 64.0  | 81  | Cardiac surgery                                           | Cardiac surgery   | RIFLE criteria                                                                                  | KDIGO-equivalent sCr-based definition  | 1,047     | 399    | 342    | 49    | 8     | 36     | 7 |
| Zappitelli (158)  | 2009 | Canada             | Retrospective | Children | 2.8   | 57  | Cardiac surgery                                           | Cardiac surgery   | pRIFLE criteria                                                                                 | KDIGO-equivalent sCr-based definition  | 390       | 140    | 80     | 41    | 19    | 7      | 6 |
| Lo (159)          | 2009 | USA                | Retrospective | Adults   | 63.5* | 61* | Hospitalization                                           | Hospital-acquired | ICD-9-CM diagnosis codes                                                                        | Administrative coding-based definition | 562,799   | 703    | -      | -     | -     | 703    | 6 |
| Haider (160)      | 2009 | USA                | Retrospective | Adults   | 48.5  | 64  | Trauma                                                    | Trauma            | ICD-9-CM diagnosis codes                                                                        | Administrative coding-based definition | 681,730   | 3,625  | -      | -     | -     | -      | 6 |
| Joannidis (161)   | 2009 | European countries | Prospective   | Adults   | 63.0  | 61  | Intensive care unit                                       | Critical care     | AKIN criteria                                                                                   | KDIGO-equivalent sCr-based             | 16,784    | 4,093  | 1,077  | 1,003 | 1,983 | -      | 7 |

|                 |      |                            |               |          |       |     |                                             |                   |                                                                                                                                                                                                               |                                        |            |           |       |       |     |     |   |
|-----------------|------|----------------------------|---------------|----------|-------|-----|---------------------------------------------|-------------------|---------------------------------------------------------------------------------------------------------------------------------------------------------------------------------------------------------------|----------------------------------------|------------|-----------|-------|-------|-----|-----|---|
|                 |      |                            |               |          |       |     |                                             |                   |                                                                                                                                                                                                               | definition                             |            |           |       |       |     |     |   |
| Manrique (162)  | 2009 | USA                        | Retrospective | Children | 1.8   | 51  | Cardiac surgery                             | Cardiac surgery   | RIFLE criteria                                                                                                                                                                                                | KDIGO-equivalent sCr-based definition  | 395        | 80        | 52    | 23    | 4   | 5   | 7 |
| Ahmadi (163)    | 2009 | Iran                       | Retrospective | Adults   | 58.6  | 75  | Cardiac surgery                             | Cardiac surgery   | Post-operative increase in sCr to > 2.0 mg/dL                                                                                                                                                                 | Other clinical definition              | 13,315     | 85        | -     | -     | -   | -   | 7 |
| Yuan (164)      | 2009 | China                      | Retrospective | Adults   | 34.0  | 77  | Road traffic injury                         | Trauma            | RIFLE criteria                                                                                                                                                                                                | KDIGO-equivalent sCr-based definition  | 3,945      | 423       | 182   | 121   | 120 | 59  | 7 |
| Abelha (165)    | 2009 | Portugal                   | Retrospective | Adults   | 64.0  | 65  | Intensive care unit                         | Critical care     | AKIN criteria                                                                                                                                                                                                 | KDIGO-equivalent sCr-based definition  | 1,166      | 87        | -     | -     | -   | -   | 7 |
| Zacharia (166)  | 2009 | USA                        | Prospective   | Adults   | 55.1  | 28  | Cerebral aneurysmal subarachnoid hemorrhage | Hospital-acquired | RIFLE criteria                                                                                                                                                                                                | KDIGO-equivalent sCr-based definition  | 787        | 179       | -     | -     | -   | -   | 8 |
| Hauer (167)     | 2009 | Germany                    | Prospective   | Adults   | 66.3  | 57  | Cardiac surgery                             | Cardiac surgery   | need for RRT                                                                                                                                                                                                  | Other clinical definition              | 1,574      | 67        | -     | -     | -   | 67  | 7 |
| Metz (168)      | 2009 | USA                        | Retrospective | Adults   | 66.2  | 67  | Cardiac surgery                             | Cardiac surgery   | Post-operative increase in sCr by $\geq$ 50%                                                                                                                                                                  | KDIGO-equivalent sCr-based definition  | 2,556      | 477       | -     | -     | -   | 43  | 7 |
| Hsu (169)       | 2009 | USA                        | Retrospective | Adults   | 73.3  | 59  | Hospitalization                             | Hospital-acquired | ICD-9-CM diagnosis codes                                                                                                                                                                                      | Administrative coding-based definition | 39,805     | 1,061     | -     | -     | -   | -   | 9 |
| Hobson (170)    | 2009 | USA                        | Retrospective | Adults   | 61.7  | 34  | Cardiac surgery                             | Cardiac surgery   | RIFLE criteria                                                                                                                                                                                                | KDIGO-equivalent sCr-based definition  | 2,973      | 1,265     | 637   | 386   | 242 | 75  | 7 |
| Bihorac (171)   | 2009 | USA                        | Retrospective | Adults   | 57.2  | 45  | Major Surgery                               | Hospital-acquired | RIFLE criteria                                                                                                                                                                                                | KDIGO-equivalent sCr-based definition  | 10,518     | 3,326     | 1,535 | 928   | 863 | 196 | 8 |
| Kajimoto (172)  | 2009 | Japan                      | Retrospective | Adults   | 59.0  | 85  | Cardiac surgery                             | Cardiac surgery   | Post-operative increase in sCr by $\geq$ 1.0 mg/dL or post-operative dialysis requirement                                                                                                                     | Other clinical definition              | 1,183      | 28        | -     | -     | -   | -   | 8 |
| Antunes (173)   | 2009 | Portugal                   | Retrospective | adults   | 60.6  | 88  | Cardiac surgery                             | Cardiac surgery   | Post-operative sCr $\geq$ 2.1 mg/dL plus an increase in sCr by $\geq$ 0.9 mg/dL if baseline sCr < 2.0 mg/dL; or increase in sCr by $\geq$ 1.5 mg/dL if baseline sCr $\geq$ 2.0 mg/dL; or dialysis requirement | Other clinical definition              | 4,567      | 256       | -     | -     | -   | -   | 8 |
| Esper (174)     | 2009 | USA                        | Retrospective | Adults   | 60.5  | 48  | Hospitalization                             | Hospital-acquired | ICD-9-CM diagnosis codes                                                                                                                                                                                      | Administrative coding-based definition | 12,500,459 | 1,000,037 | -     | -     | -   | -   | 8 |
| Kheterpal (175) | 2009 | USA                        | Prospective   | Adults   | 53.6  | 39  | General surgery                             | Hospital-acquired | Increase in sCr to at least 2 mg/dL or dialysis requirement                                                                                                                                                   | Other clinical definition              | 75,952     | 762       | -     | -     | -   | 561 | 8 |
| Tsagalis (176)  | 2009 | Greece                     | Prospective   | Adults   | 70.4  | 61  | Acute stroke                                | Hospital-acquired | AKIN criteria                                                                                                                                                                                                 | KDIGO-equivalent sCr-based definition  | 2,155      | 575       | 460   | 62    | 53  | -   | 6 |
| Georgiou (177)  | 2009 | USA                        | Retrospective | Adults   | NR    | 78  | Trauma                                      | Trauma            | ICD-9-CM diagnosis codes                                                                                                                                                                                      | Administrative coding-based definition | 36,038     | 296       | -     | -     | -   | -   | 7 |
| Huffmyer (178)  | 2009 | USA                        | Retrospective | Adults   | NR    | NR  | Cardiac surgery                             | Cardiac surgery   | Decrease in eGFR by 50%                                                                                                                                                                                       | Other clinical definition              | 2,760      | 765       | -     | -     | -   | 74  | 7 |
| Bagshaw (179)   | 2009 | Canada , USA, Saudi Arabia | Retrospective | Adults   | 62.5  | 57  | Septic shock                                | Hospital-acquired | RIFLE criteria                                                                                                                                                                                                | KDIGO-equivalent sCr-based definition  | 4,532      | 2,917     | 738   | 1,332 | 847 | -   | 7 |
| Ishani (180)    | 2009 | USA                        | Retrospective | Adults   | 79.2  | 39  | Hospitalization                             | Hospital-acquired | ICD-9-CM diagnosis codes                                                                                                                                                                                      | Administrative coding-based definition | 233,803    | 7,197     | -     | -     | -   | -   | 8 |
| Silva (181)     | 2009 | Brazil                     | Retrospective | Adults   | 45.0* | 77* | Intensive care unit                         | Critical care     | RIFLE criteria                                                                                                                                                                                                | KDIGO-equivalent sCr-based definition  | 829        | 147       | 7     | 32    | 108 | 52  | 7 |

|                        |      |                         |               |          |       |     |                                                      |                    |                                                                                       |                                       |         |        |        |        |       |       |   |
|------------------------|------|-------------------------|---------------|----------|-------|-----|------------------------------------------------------|--------------------|---------------------------------------------------------------------------------------|---------------------------------------|---------|--------|--------|--------|-------|-------|---|
| Lecomte (182)          | 2008 | Belgium                 | Retrospective | Adults   | NR    | 65  | Cardiac surgery                                      | Cardiac surgery    | RIFLE criteria                                                                        | KDIGO-equivalent sCr-based definition | 1,050   | 525    | 159    | 21     | 5     | -     | 6 |
| Ostermann (183)        | 2008 | UK and Germany          | Retrospective | Adults   | 60.9  | NR  | Intensive care unit                                  | Critical care      | AKIN criteria                                                                         | KDIGO-equivalent sCr-based definition | 22,303  | 7,898  | 4,259  | 857    | 2,782 | 1,847 | 6 |
| Benedetto (184)        | 2008 | Italy                   | Prospective   | Adults   | 67.5  | 84  | Cardiac surgery                                      | Cardiac surgery    | Post-operative dialysis requirement or post-operative decrease in eGFR by $\geq 50\%$ | Other clinical definition             | 536     | 49     | -      | -      | -     | 23    | 5 |
| Lopes (185)            | 2008 | Portugal                | Retrospective | Adults   | 58.6  | 59  | Intensive care unit                                  | Critical care      | AKIN criteria                                                                         | KDIGO-equivalent sCr-based definition | 662     | 334    | 140    | 67     | 127   | 79    | 7 |
| Arora (186)            | 2008 | USA                     | Retrospective | Adults   | 65.9  | 79  | Cardiac surgery                                      | Cardiac surgery    | RIFLE criteria                                                                        | KDIGO-equivalent sCr-based definition | 1,358   | 546    | 537    | 7      | 2     | -     | 8 |
| Bagshaw (187)          | 2008 | Australia, New Zealand  | Retrospective | Adults   | 50.1  | 70  | Trauma                                               | Trauma             | RIFLE criteria                                                                        | KDIGO-equivalent sCr-based definition | 9,449   | 1,711  | 888    | 681    | 142   | -     | 7 |
| Bagshaw (187)          | 2008 | Australia, New Zealand  | Retrospective | Adults   | 66.0  | 59  | Non-trauma hospitalization                           | Hospital-acquired  | RIFLE criteria                                                                        | KDIGO-equivalent sCr-based definition | 110,638 | 41,648 | -      | -      | -     | -     | 8 |
| Roe (188)              | 2008 | UK                      | Retrospective | Adults   | 34.6  | 62  | Human immunodeficiency virus infection               | Community-acquired | Increase in sCr > 1.36 mg/dL or peak sCr > 150% from baseline                         | Other clinical definition             | 2,274   | 130    | -      | -      | -     | 33    | 7 |
| Payen (189)            | 2008 | 24 European countries   | Prospective   | Adults   | 60.6  | 62  | Sepsis                                               | Hospital-acquired  | SOFA renal score (sCr > 3.5 mg/dL or urine output < 500 mL/day)                       | Other clinical definition             | 3,147   | 1,120  | -      | -      | -     | 278   | 7 |
| Plötz (190)            | 2008 | The Netherlands         | Retrospective | Children | 6.1   | 61  | Respiratory failure requiring mechanical ventilation | Hospital-acquired  | pRIFLE criteria                                                                       | KDIGO-equivalent sCr-based definition | 103     | 60     | 31     | 22     | 7     | 6     | 6 |
| Nickolas (191)         | 2008 | USA                     | Prospective   | Adults   | 60.1  | 51  | Hospitalization                                      | Hospital-acquired  | RIFLE criteria                                                                        | KDIGO-equivalent sCr-based definition | 635     | 30     | -      | -      | -     | 9     | 8 |
| Perez Valdivieso (192) | 2008 | Spain                   | Prospective   | Adults   | 62.1  | 71  | Hospitalization                                      | Hospital-acquired  | RIFLE criteria                                                                        | KDIGO-equivalent sCr-based definition | 903     | 644    | 112    | 185    | 347   | 202   | 6 |
| Candela-Toha (193)     | 2008 | Spain                   | Retrospective | Adults   | 65.9  | 60  | Cardiac surgery                                      | Cardiac surgery    | Need for RRT                                                                          | Other clinical definition             | 1,780   | 67     | -      | -      | -     | 67    | 7 |
| Pedersen (194)         | 2008 | Denmark                 | Prospective   | Children | 0.7   | 56  | Cardiac surgery                                      | Cardiac surgery    | Need for RRT                                                                          | Other clinical definition             | 1,128   | 130    | -      | -      | -     | 130   | 7 |
| Athappan (195)         | 2008 | India                   | Prospective   | Adults   | 35.9  | 55  | Snake bite                                           | Hospital-acquired  | Increase in sCr by $\geq 50\%$                                                        | KDIGO-equivalent sCr-based definition | 1,180   | 159    | -      | -      | -     | 72    | 6 |
| García-Rodríguez (196) | 2008 | UK                      | Prospective   | adults   | 61.0  | 53  | Statin use                                           | Community-acquired | Doubling of sCr                                                                       | Other clinical definition             | 127,391 | 14     | -      | -      | -     | -     | 5 |
| García-Rodríguez (197) | 2008 | Canada                  | Prospective   | adults   | 63.9  | 55  | Statin use                                           | Community-acquired | Doubling of sCr                                                                       | Other clinical definition             | 25,238  | 17     | -      | -      | -     | -     | 6 |
| Zappitelli (198)       | 2008 | USA                     | Prospective   | Children | 6.4   | 55  | Intensive care unit                                  | Critical care      | pRIFLE and AKIN criteria                                                              | KDIGO-equivalent sCr-based definition | 150     | 56     | -      | -      | -     | 1     | 7 |
| Zappitelli (198)       | 2008 | USA                     | Retrospective | Children | 7.8   | 49  | Aminoglycoside use                                   | Nephrotoxins       | pRIFLE criteria                                                                       | KDIGO-equivalent sCr-based definition | 254     | 71     | -      | -      | -     | -     | 7 |
| Bagshaw (199)          | 2008 | Australia               | Retrospective | Adults   | 61.7  | 59  | Intensive care unit                                  | Critical care      | RIFLE criteria                                                                        | KDIGO-equivalent sCr-based definition | 120,123 | 43,395 | 19,545 | 16,370 | 7,541 | -     | 6 |
| Hsu (200)              | 2008 | USA                     | Retrospective | Adults   | 57.3  | 43  | Hospitalization                                      | Hospital-acquired  | Need for RRT                                                                          | Other clinical definition             | 602,584 | 1,764  | -      | -      | -     | 1,764 | 7 |
| Lassnigg (201)         | 2008 | Austria and Switzerland | Prospective   | Adults   | 63.6  | 69  | Cardiac surgery                                      | Cardiac surgery    | AKIN criteria                                                                         | KDIGO-equivalent sCr-based definition | 7,241   | 597    | 463    | 3      | 131   | 321   | 7 |
| Lima (202)             | 2008 | Brazil                  | Retrospective | Adults   | 45.0* | 77* | Intensive care unit                                  | Critical care      | RIFLE criteria                                                                        | KDIGO-equivalent sCr-based definition | 829     | 147    | 7      | 32     | 108   | 52    | 5 |

|                        |      |                           |               |          |       |     |                                    |                   |                                                                                                                                 |                                        |         |        |        |        |        |     |   |
|------------------------|------|---------------------------|---------------|----------|-------|-----|------------------------------------|-------------------|---------------------------------------------------------------------------------------------------------------------------------|----------------------------------------|---------|--------|--------|--------|--------|-----|---|
| Csaicsich (203)        | 2008 | Austria                   | Retrospective | children | 0.0   | NR  | Intensive care unit                | Critical care     | sCr > 1.5 mg/dL and/or oliguria/anuria (urine output < 1 and < 0.5 mL/kg/hour, respectively)                                    | Other clinical definition              | 359     | 16     | -      | -      | -      | -   | 6 |
| Roghi (204)            | 2008 | Italy                     | Prospective   | Adults   | 63.0  | 78  | Percutaneous coronary intervention | Nephrotoxins      | Increase in sCr by $\geq 0.5$ mg/dL or > 25% from baseline                                                                      | Other clinical definition              | 2,860   | 106    | -      | -      | -      | -   | 6 |
| Daher (205)            | 2008 | Brazil                    | Retrospective | Adults   | 45.0* | 77* | Infectious                         | Hospital-acquired | RIFLE criteria                                                                                                                  | KDIGO-equivalent sCr-based definition  | 722     | 147    | 8      | 32     | 107    | 52  | 7 |
| Bagshaw (206)          | 2008 | Australia and New Zealand | Retrospective | Adults   | 61.6  | 60  | Intensive care unit                | Critical care     | AKIN criteria                                                                                                                   | KDIGO-equivalent sCr-based definition  | 120,123 | 44,553 | 21,741 | 12,160 | 10,652 | -   | 6 |
| Mittalhenkle (207)     | 2008 | USA                       | Prospective   | Adults   | 73.1  | 42  | Hospitalization                    | Hospital-acquired | ICD-9-CM diagnosis codes                                                                                                        | Administrative coding-based definition | 5,731   | 225    | -      | -      | -      | -   | 8 |
| Schetz (208)           | 2008 | Belgium                   | Post-hoc RCT  | Adults   | 63.0  | 67  | Intensive care unit                | Critical care     | Doubling of sCr                                                                                                                 | Other clinical definition              | 2,707   | 516    | 163    | 101    | 63     | 291 | 6 |
| Dasta (209)            | 2008 | USA                       | Retrospective | Adults   | 69.9* | 63* | Cardiac surgery                    | Cardiac surgery   | Post-operative increase in sCr by $\geq 0.5$ mg/dL                                                                              | Other clinical definition              | 3,741   | 258    | 138    | 70     | 50     | 9   | 7 |
| Karkouti (210)         | 2008 | Canada                    | Retrospective | Adults   | 65.2  | 76  | Cardiac surgery                    | Cardiac surgery   | Increase in sCr by > 100% or dialysis requirement                                                                               | Other clinical definition              | 3,286   | 173    | -      | -      | -      | -   | 7 |
| Covic (211)            | 2008 | Romania                   | Retrospective | Adults   | 66.1  | 51  | Stroke                             | Hospital-acquired | RIFLE criteria                                                                                                                  | KDIGO-equivalent sCr-based definition  | 1,090   | 158    | 115    | 33     | 10     | -   | 7 |
| Bagshaw (212)          | 2008 | Australia and New Zealand | Retrospective | Adults   | 65.3  | 60  | Intensive care unit                | Critical care     | RIFLE criteria                                                                                                                  | KDIGO-equivalent sCr-based definition  | 120,123 | 43,395 | 19,547 | 16,344 | 7,504  | -   | 8 |
| From (213)             | 2008 | USA                       | Retrospective | Adults   | 61.0  | 53  | Cardiac catheterization            | Nephrotoxins      | Post-procedure increase in sCr by $\geq 25\%$ or > 0.5 mg/dL within 7 days                                                      | Other clinical definition              | 11,516  | 1,343  | -      | -      | -      | -   | 6 |
| Washburn (214)         | 2008 | USA                       | Prospective   | Children | 6.5   | 53  | Intensive care unit                | Critical care     | pRIFLE criteria                                                                                                                 | KDIGO-equivalent sCr-based definition  | 137     | 103    | 50     | 28     | 25     | 6   | 7 |
| Iglesias (215)         | 2008 | USA                       | Retrospective | Adults   | 80.3  | 47  | Heart failure                      | Heart failure     | Increase in sCr by $\geq 0.3$ mg/dL                                                                                             | KDIGO-equivalent sCr-based definition  | 682     | 221    | -      | -      | -      | -   | 6 |
| López-Herce (216)      | 2008 | Spain                     | Prospective   | Children | 1.9   | 56  | Trans-pyloric enteral nutrition    | Hospital-acquired | Increase in sCr to > twice the 95 <sup>th</sup> percentile for age, with or without change in urine output, and/or need for RRT | Other clinical definition              | 526     | 53     | -      | -      | -      | 38  | 6 |
| Kheterpal (217)        | 2007 | USA                       | Prospective   | Adults   | 47.1  | 52  | Major noncardiac surgery           | Hospital-acquired | Post-operative decrease in calculated creatinine clearance to $\leq 50$ mL/min within the 7 days                                | Other clinical definition              | 15,102  | 121    | -      | -      | -      | 14  | 8 |
| Perez Valdivieso (218) | 2007 | Spain                     | Prospective   | Adults   | 62.4  | 69  | Hospitalization                    | Hospital-acquired | RIFLE criteria                                                                                                                  | KDIGO-equivalent sCr-based definition  | 668     | 386    | 83     | 109    | 194    | -   | 7 |
| Eachempati (219)       | 2007 | USA                       | Prospective   | Adults   | 63.3  | 60  | Intensive care unit                | Critical care     | Increase in sCr to 2.4 mg/dL                                                                                                    | Other clinical definition              | 8,505   | 530    | -      | -      | -      | 104 | 8 |
| Liu (220)              | 2007 | USA                       | Post-hoc RCT  | Adults   | 51.8  | 60  | Acute lung injury                  | Hospital-acquired | Increase in sCr by > 50% within 4 days                                                                                          | KDIGO-equivalent sCr-based definition  | 876     | 209    | -      | -      | -      | -   | 7 |
| Thakar (221)           | 2007 | USA                       | Retrospective | Adults   | 68.6  | 70  | Cardiac surgery                    | Cardiac surgery   | Post-operative decrease in GFR by $\geq 50\%$ or dialysis requirement                                                           | Other clinical definition              | 31,677  | 1,863  | -      | -      | -      | 555 | 7 |

|                       |      |                |               |                   |       |     |                                    |                     |                                                                                                                                                                                                                                              |                                        |           |         |       |       |       |        |   |
|-----------------------|------|----------------|---------------|-------------------|-------|-----|------------------------------------|---------------------|----------------------------------------------------------------------------------------------------------------------------------------------------------------------------------------------------------------------------------------------|----------------------------------------|-----------|---------|-------|-------|-------|--------|---|
| Bouzas-Mosquera (222) | 2007 | Spain          | Prospective   | Adults            | 61.0  | 84  | Cardiac catheterization            | Nephrotoxins        | Post-procedure increase in sCr by $\geq 0.5$ mg/dL within 3 days                                                                                                                                                                             | Other clinical definition              | 602       | 72      | -     | -     | -     | 8      | 7 |
| Landoni (223)         | 2007 | Italy          | Prospective   | Adults            | 64.1  | 84  | Cardiac surgery                    | Cardiac surgery     | Doubling of sCr from baseline                                                                                                                                                                                                                | Other clinical definition              | 3,103     | 68      | -     | -     | -     | 24     | 6 |
| Pedersen (224)        | 2007 | Denmark        | Prospective   | Children          | 0.7   | 56  | Cardiac surgery                    | Cardiac surgery     | Need for RRT                                                                                                                                                                                                                                 | Other clinical definition              | 1,128     | 130     | -     | -     | -     | 130    | 8 |
| Swaminathan (225)     | 2007 | USA            | Retrospective | Adults            | 71.9* | 65* | Cardiac surgery                    | Cardiac surgery     | ICD-9-CM diagnosis codes                                                                                                                                                                                                                     | Administrative coding-based definition | 7,339,520 | 290,023 | -     | -     | -     | 30,033 | 7 |
| Del Duca (226)        | 2007 | Canada         | Prospective   | Adults            | 65.0  | 69  | Cardiac surgery                    | Cardiac surgery     | Post-operative increase in sCr by $\geq 25\%$ within 3 days                                                                                                                                                                                  | Other clinical definition              | 649       | 156     | -     | -     | -     | 27     | 8 |
| Chawla (227)          | 2007 | USA            | Post-hoc RCT  | Adults            | 59.8  | 57  | Severe sepsis                      | Hospital-acquired   | Increase in sCr by $\geq 25\%$ or $\geq 0.3$ mg/dL within 7 days                                                                                                                                                                             | Other clinical definition              | 547       | 127     | -     | -     | -     | 25     | 7 |
| Cruz (228)            | 2007 | Italy          | Prospective   | Adults            | 64.3  | 62  | Intensive care unit                | Critical care       | RIFLE criteria                                                                                                                                                                                                                               | KDIGO-equivalent sCr-based definition  | 2,164     | 234     | 45    | 82    | 107   | 71     | 7 |
| Zappitelli (229)      | 2007 | USA            | Prospective   | Children          | 6.3   | 54  | Intensive care unit                | Critical care       | pRIFLE criteria                                                                                                                                                                                                                              | KDIGO-equivalent sCr-based definition  | 140       | 106     | 50    | 31    | 25    | 7      | 8 |
| Doddakula (230)       | 2007 | Ireland        | Retrospective | Adults            | 63.2  | 72  | Cardiac surgery                    | Cardiac surgery     | Need for RRT                                                                                                                                                                                                                                 | Other clinical definition              | 1,609     | 47      | -     | -     | -     | 47     | 6 |
| Di Bella (231)        | 2007 | Italy          | Prospective   | Adults            | 66.2  | 69  | Cardiac surgery                    | Cardiac surgery     | Need for RRT                                                                                                                                                                                                                                 | Other clinical definition              | 1,642     | 22      | -     | -     | -     | 22     | 6 |
| Sizzi (232)           | 2007 | Italy          | Prospective   | Adults            | 36.1  | 0   | Laparoscopic myomectomy            | Hospital-acquired   | Need for RRT                                                                                                                                                                                                                                 | Other clinical definition              | 2,050     | 1       | -     | -     | -     | 1      | 9 |
| Palomba (233)         | 2007 | Brazil         | Prospective   | Adults            | 60.1  | 62  | Cardiac surgery                    | Cardiac surgery     | Increase in sCr to $> 2.0$ mg/dL or by $\geq 50\%$ from baseline                                                                                                                                                                             | Other clinical definition              | 603       | 66      | -     | -     | -     | 11     | 6 |
| Ostermann (234)       | 2007 | UK and Germany | Retrospective | Adults            | 60.5  | 64  | Intensive care unit                | Critical care       | RIFLE criteria                                                                                                                                                                                                                               | KDIGO-equivalent sCr-based definition  | 41,972    | 15,019  | 7,207 | 4,613 | 3,199 | 1,836  | 5 |
| Brandt (235)          | 2007 | USA            | Retrospective | Adults            | 47.4  | 74  | Trauma                             | Trauma              | Increase in sCr to $> 1.5$ mg/dL or by $> 50\%$ , or by $\geq 0.5$ mg/dL                                                                                                                                                                     | Other clinical definition              | 1033      | 246     | -     | -     | -     | 25     | 5 |
| Prescott (236)        | 2007 | UK             | Prospective   | Adults            | 67.0* | 61* | Hospitalization                    | Hospital-acquired   | Need for RRT                                                                                                                                                                                                                                 | Other clinical definition              | 5,054,800 | 809     | -     | -     | -     | 809    | 8 |
| Newell (237)          | 2007 | USA            | Retrospective | Adults            | 45.2  | 72  | Trauma                             | Trauma              | sCr $\geq 3.5$ mg/dL, BUN $> 100$ mg/dL, or RRT                                                                                                                                                                                              | Other clinical definition              | 1,543     | 17      | -     | -     | -     | -      | 6 |
| Thombs (238)          | 2007 | USA            | Retrospective | Adults            | 43.3  | 73  | Burn                               | Hospital-acquired   | ICD-9-CM diagnosis codes                                                                                                                                                                                                                     | Administrative coding-based definition | 31,338    | 117     | -     | -     | -     | -      | 6 |
| Akcan-Arikan (239)    | 2007 | USA            | Prospective   | Children          | 6.4   | 55  | Intensive care unit                | Critical care       | pRIFLE criteria                                                                                                                                                                                                                              | KDIGO-equivalent sCr-based definition  | 150       | 123     | 60    | 32    | 31    | 11     | 6 |
| Ali (240)             | 2007 | UK             | Retrospective | Adults            | 76.0* | 54* | Hospitalization                    | Hospital-acquired   | RIFLE criteria                                                                                                                                                                                                                               | KDIGO-equivalent sCr-based definition  | 5,321     | 474     | 105   | 233   | 136   | 37     | 7 |
| Feldman (241)         | 2007 | USA            | Retrospective | Adults            | 64.7  | 66  | Percutaneous coronary intervention | Nephrotoxins        | Increase in sCr to $\geq 2.5$ mg/dL and/or dialysis requirement                                                                                                                                                                              | Other clinical definition              | 47,020    | 47      | -     | -     | -     | -      | 6 |
| Hingorani (242)       | 2007 | USA            | Retrospective | Children & Adults | 38.5  | 47  | Hematopoietic cell transplant      | Hematology/Oncology | Increase in sCr to $> 2.0$ mg/dL (in men), $> 1.8$ mg/dL (in women), $> 1.0$ mg/dL (in children age 2–16 years), or $> 0.6$ mg/dL (in children age $< 2$ years), or doubling of serum creatinine in the first 100 days after transplantation | Other clinical definition              | 1,635     | 332     | -     | -     | -     | -      | 5 |

|                        |      |                    |               |          |       |     |                                                      |                    |                                                                                                                           |                                        |         |       |       |       |     |     |   |
|------------------------|------|--------------------|---------------|----------|-------|-----|------------------------------------------------------|--------------------|---------------------------------------------------------------------------------------------------------------------------|----------------------------------------|---------|-------|-------|-------|-----|-----|---|
| Chittineni (243)       | 2007 | USA                | Retrospective | Adults   | 77.6  | 45  | Decompensated congestive heart failure               | Heart failure      | Increase in sCr by $\geq 0.5$ mg/dL from baseline                                                                         | Other clinical definition              | 509     | 107   | -     | -     | -   | -   | 5 |
| Bailey (244)           | 2007 | Canada             | Prospective   | Children | 6.0   | 46  | Intensive care unit                                  | Critical care      | Doubling of baseline sCr                                                                                                  | Other clinical definition              | 985     | 44    | -     | -     | -   | 7   | 6 |
| Sakr (245)             | 2007 | European countries | Prospective   | Adults   | 61.0  | 62  | Intensive care unit                                  | Critical care      | Need for RRT                                                                                                              | Other clinical definition              | 3,147   | 115   | -     | -     | -   | 115 | 7 |
| Bányász (246)          | 2006 | Hungary            | Retrospective | Children | 0.0   | 32  | Low-birth weight                                     | Critical care      | BUN > 40 mg/dL or sCr > 1 mg/dL                                                                                           | Other clinical definition              | 328     | 41    | -     | -     | -   | -   | 7 |
| Prakash (247)          | 2006 | India              | Prospective   | Adults   | 44.9  | 57  | Intensive care unit                                  | Critical care      | Increase in sCr by $\geq 0.5$ mg/dL (if baseline sCr < 1.5 mg/dL), or by $\geq 1.0$ mg/dL (if baseline sCr 1.5-5.0 mg/dL) | Other clinical definition              | 1,215   | 46    | -     | -     | -   | 25  | 7 |
| Charytan (248)         | 2006 | USA                | Prospective   | Adults   | 66.8  | 74  | Cardiac surgery                                      | Cardiac surgery    | Post-operative increase in sCr by > 50%, or need for RRT                                                                  | Other clinical definition              | 1,117   | 31    | -     | -     | -   | 9   | 8 |
| Plurad (249)           | 2006 | USA                | Retrospective | Adults   | 35.4  | 84  | Emergency department hypotension with post-traumatic | Trauma             | Peak sCr > 2.0 mg/dL                                                                                                      | Other clinical definition              | 2,574   | 213   | -     | -     | -   | 28  | 7 |
| Boyle (250)            | 2006 | USA                | Prospective   | Adults   | 56.9  | 80  | Cardiac Transplantation                              | Hospital-acquired  | Need for RRT                                                                                                              | Other clinical definition              | 756     | 44    | -     | -     | -   | 44  | 7 |
| Schneider (251)        | 2006 | Canada             | Retrospective | Adults   | 78.1* | 46* | NSAID use                                            | Community-acquired | ICD-9-CM diagnosis codes                                                                                                  | Administrative coding-based definition | 121,722 | 4,228 | -     | -     | -   | -   | 7 |
| Hein (252)             | 2006 | Germany            | Retrospective | Adults   | 67.0  | 68  | Cardiac surgery                                      | Cardiac surgery    | Need for RRT                                                                                                              | Other clinical definition              | 2,683   | 254   | -     | -     | -   | 254 | 6 |
| Sharma (253)           | 2006 | USA                | Retrospective | Adults   | 50.0* | 55* | Laparoscopic gastric bariatric surgery               | Hospital-acquired  | Increase in sCr to > 1.4 mg/dL with an increase in sCr by > 0.3 mg/dL from baseline within 7 days                         | Other clinical definition              | 1,800   | 42    | -     | -     | -   | 6   | 5 |
| Vachvanichsanong (254) | 2006 | Thailand           | Retrospective | Children | 7.6*  | 56* | Hospitalization                                      | Hospital-acquired  | Increase in sCr > 2.0 mg/dL or doubling of sCr                                                                            | Other clinical definition              | 60,160  | 311   | -     | -     | -   | 55  | 7 |
| Karkouti (255)         | 2006 | Canada             | Prospective   | Adults   | 64.0  | 64  | Cardiac surgery                                      | Cardiac surgery    | Increase in baseline-to-peak post-operative sCr by > 2.0-fold within 7 days, or dialysis requirement                      | Other clinical definition              | 655     | 114   | -     | -     | -   | -   | 8 |
| Mahajan (256)          | 2006 | India              | Retrospective | Adults   | 66.4* | 71* | Aged $\geq 60$ years                                 | Community-acquired | Increase in sCr to > 2 mg/dL or by $\geq 25\%$ if CKD present                                                             | Other clinical definition              | 929     | 454   | -     | -     | -   | 152 | 6 |
| Heringlake (257)       | 2006 | Germany            | Prospective   | Adults   | NR    | NR  | Cardiac surgery                                      | Cardiac surgery    | RIFLE criteria                                                                                                            | KDIGO-equivalent sCr-based definition  | 29,623  | 4,562 | 2,667 | 1,481 | 592 | -   | 6 |
| Ahlström (258)         | 2006 | Finland            | Prospective   | Adults   | 63.4  | NR  | Intensive care unit                                  | Critical care      | RIFLE criteria                                                                                                            | KDIGO-equivalent sCr-based definition  | 658     | 342   | 168   | 100   | 74  | 47  | 5 |
| Mathur (259)           | 2006 | India              | Retrospective | Children | 0.0   | NR  | Neonatal Sepsis                                      | Hospital-acquired  | BUN > 20 mg/dL on two separate occasions at least one day apart                                                           | Other clinical definition              | 200     | 52    | -     | -     | -   | -   | 5 |
| Black (260)            | 2006 | UK                 | Prospective   | Adults   | 70.9  | 68  | Angiography                                          | Nephrotoxins       | Post-operative increase in sCr by > 50%                                                                                   | Other clinical definition              | 1,559   | 90    | -     | -     | -   | 16  | 6 |
| Uchino (261)           | 2006 | Australia          | Retrospective | Adults   | 63.7  | 55  | Hospitalization                                      | Hospital-acquired  | RIFLE criteria                                                                                                            | KDIGO-equivalent sCr-based definition  | 20,126  | 3,623 | 1,831 | 1,047 | 745 | -   | 5 |

|                     |      |                 |               |          |       |     |                                                |                    |                                                                                                                                             |                                        |           |         |     |       |       |        |   |
|---------------------|------|-----------------|---------------|----------|-------|-----|------------------------------------------------|--------------------|---------------------------------------------------------------------------------------------------------------------------------------------|----------------------------------------|-----------|---------|-----|-------|-------|--------|---|
| Hoste (262)         | 2006 | USA             | Retrospective | Adults   | 60.6  | 52  | Intensive care unit                            | Critical care      | RIFLE criteria                                                                                                                              | KDIGO-equivalent sCr-based definition  | 5,383     | 3,617   | 670 | 1,436 | 1,511 | 219    | 7 |
| Junge (263)         | 2006 | Germany         | Retrospective | Adults   | 53.7* | 55* | Liver transplantation                          | Hospital-acquired  | Decrease in calculated GFR by > 50% or by a doubled serum creatinine above 2.5 mg/dL                                                        | Other clinical definition              | 1,352     | 162     | -   | -     | -     | 52     | 4 |
| Wald (264)          | 2006 | USA             | Retrospective | Adults   | 72.4  | 80  | Endovascular aneurysmal repair                 | Hospital-acquired  | ICD-9-CM diagnosis codes                                                                                                                    | Administrative coding-based definition | 6,516     | 439     | -   | -     | -     | 56     | 7 |
| Xue (265)           | 2006 | USA             | Retrospective | Adults   | 73.8  | 43  | Hospitalization                                | Hospital-acquired  | ICD-9-CM diagnosis codes                                                                                                                    | Administrative coding-based definition | 5,403,015 | 127,614 | -   | -     | -     | 19,014 | 8 |
| Chan (266)          | 2006 | Canada          | Retrospective | Adults   | 67.1  | NR  | Cardiac surgery                                | Cardiac surgery    | Need for RRT                                                                                                                                | Other clinical definition              | 9,721     | 255     | -   | -     | -     | 255    | 8 |
| Noyez (267)         | 2006 | The Netherlands | Prospective   | Adults   | 64.2  | 78  | Cardiac surgery                                | Cardiac surgery    | Increase in sCr to $\geq 1.7$ mg/dL or dialysis                                                                                             | Other clinical definition              | 627       | 15      | -   | -     | -     | -      | 7 |
| Beaver (268)        | 2006 | USA             | Retrospective | Adults   | 62.1  | 64  | Cardiac surgery                                | Cardiac surgery    | Need for RRT                                                                                                                                | Other clinical definition              | 940       | 36      | -   | -     | -     | 36     | 7 |
| Wyatt (269)         | 2006 | USA             | Retrospective | Adults   | 43.4  | 62  | Human immunodeficiency virus infection         | Community-acquired | ICD-9-CM diagnosis codes                                                                                                                    | Administrative coding-based definition | 25,114    | 1,516   | -   | -     | -     | -      | 7 |
| Kuitunen (270)      | 2006 | Finland         | Prospective   | Adults   | NR    | NR  | Cardiac surgery                                | Cardiac surgery    | RIFLE criteria                                                                                                                              | KDIGO-equivalent sCr-based definition  | 813       | 156     | -   | -     | -     | 26     | 7 |
| Wijeyesundera (271) | 2006 | Canada          | Prospective   | Adults   | 62.0  | 74  | Cardiac surgery                                | Cardiac surgery    | Need for RRT                                                                                                                                | Other clinical definition              | 10,751    | 137     | -   | -     | -     | 137    | 8 |
| Landoni (272)       | 2006 | Italy           | Retrospective | Adults   | 61.1  | 69  | Cardiac surgery                                | Cardiac surgery    | Need for RRT                                                                                                                                | Other clinical definition              | 7,846     | 126     | -   | -     | -     | 126    | 8 |
| Bah (273)           | 2006 | Guinea          | Retrospective | Adults   | 44.0  | 60  | Hospitalization                                | Hospital-acquired  | Need for RRT                                                                                                                                | Other clinical definition              | 606       | 21      | -   | -     | -     | 21     | 4 |
| Gamborgi (274)      | 2006 | Brazil          | Retrospective | Adults   | 49.0* | 62* | Hospitalization (contact with Lonomia oblique) | Hospital-acquired  | sCr $\geq 1.5$ mg/dL with no prior history of kidney disease                                                                                | Other clinical definition              | 2,067     | 39      | -   | -     | -     | 11     | 7 |
| Conen (275)         | 2006 | Switzerland     | Retrospective | Adults   | 64.2  | 74  | Percutaneous coronary intervention             | Nephrotoxins       | Increase in sCr by $\geq 25\%$ from baseline                                                                                                | Other clinical definition              | 1,383     | 139     | -   | -     | -     | -      | 7 |
| Bahar (276)         | 2005 | Turkey          | Retrospective | Adults   | 48.7  | 72  | Cardiac surgery                                | Cardiac surgery    | Need for RRT                                                                                                                                | Other clinical definition              | 14,437    | 168     | -   | -     | -     | 168    | 8 |
| Ranucci (277)       | 2005 | Italy           | Prospective   | Adults   | 67.5  | 78  | Cardiac surgery                                | Cardiac surgery    | Need for RRT                                                                                                                                | Other clinical definition              | 1,048     | 28      | -   | -     | -     | 28     | 5 |
| Bagshaw (278)       | 2005 | Canada          | Prospective   | Adults   | 64.9  | 62  | Intensive care unit                            | Critical care      | Need for RRT                                                                                                                                | Other clinical definition              | 5,693     | 240     | -   | -     | -     | 240    | 8 |
| Ciesla (279)        | 2005 | USA             | Prospective   | Adults   | 37.5  | 73  | Trauma                                         | Trauma             | Increase in sCr to $> 1.8$ mg/dL and absence of previous renal illness                                                                      | Other clinical definition              | 1,344     | 168     | -   | -     | -     | -      | 7 |
| Cataldi (280)       | 2005 | Italy           | Retrospective | Children | 0.0   | 59  | Preterm birth                                  | Critical care      | Increase in sCr to $> 1.3$ ( $< 33$ weeks gestation) or $> 1$ mg/dL ( $> 33$ week gestation) $\pm$ oliguria (urine output $< 1$ mL/kg/hour) | Other clinical definition              | 172       | 71      | -   | -     | -     | -      | 7 |
| Kincaid (281)       | 2005 | USA             | Retrospective | Adults   | 62.2  | 68  | Cardiac surgery                                | Cardiac surgery    | Post-operative increase in sCr to $> 2.0$ mg/dL within 3 days                                                                               | Other clinical definition              | 1,209     | 42      | -   | -     | -     | 24     | 7 |
| Baskin (282)        | 2005 | Turkey          | Prospective   | Children | 0.25  | 66  | Cardiac surgery                                | Cardiac surgery    | Increase in sCr to $> 1.2$ mg/dL and/or decrease in urine output to $< 0.5$ mL/kg/hour                                                      | Other clinical definition              | 64        | 21      | -   | -     | -     | -      | 7 |
| Hollenbeck (283)    | 2005 | USA             | Prospective   | Adults   | 65.5  | 99  | Radical cystectomy                             | Hospital-acquired  | Need for RRT                                                                                                                                | Other clinical definition              | 2,538     | 20      | -   | -     | -     | 20     | 6 |
| Carter (284)        | 2005 | USA             | Retrospective | Adults   | NR    | 86  | Heat illness                                   | Hospital-acquired  | ICD-9-CM diagnosis codes                                                                                                                    | Administrative coding-based            | 5,246     | 78      | -   | -     | -     | -      | 6 |

|                    |      |                                        |               |          |      |      |                                            |                    |                                                                                                                                                   |                                        |         |       |   |   |   |       |   |
|--------------------|------|----------------------------------------|---------------|----------|------|------|--------------------------------------------|--------------------|---------------------------------------------------------------------------------------------------------------------------------------------------|----------------------------------------|---------|-------|---|---|---|-------|---|
|                    |      |                                        |               |          |      |      |                                            |                    |                                                                                                                                                   | definition                             |         |       |   |   |   |       |   |
| Uchino (285)       | 2005 | Asia, European, USA, Canada, Australia | Prospective   | Adults   | 67.0 | 63.6 | Intensive care unit                        | Critical care      | Oliguria (urine output < 200 mL in 12 hours) and/or marked azotemia (BUN > 84 mg/dL)                                                              | Other clinical definition              | 29,269  | 1,738 | - | - | - | 1,260 | 5 |
| Kubal (286)        | 2005 | UK                                     | Retrospective | Adults   | 64.4 | 80.6 | Cardiac surgery                            | Cardiac surgery    | Need for RRT                                                                                                                                      | Other clinical definition              | 6033    | 61    | - | - | - | 61    | 7 |
| Franceschini (287) | 2005 | USA                                    | Prospective   | adults   | 40.0 | 68   | Human immunodeficiency virus infection     | Community-acquired | Increase in sCr by 0.5 mg/dL (if baseline sCr < 2.0 mg/dL), 1.0 mg/dL (if baseline sCr 2.0-4.9 mg/dL), or 1.5 mg/dL (if baseline sCr ≥ 5.0 mg/dL) | Other clinical definition              | 754     | 71    | - | - | - | 5     | 8 |
| Huerta (288)       | 2005 | UK                                     | Retrospective | Adults   | NR   | NR   | Outpatient                                 | Community-acquired | Bun > 47.6 mg/dL, Cr > 1.7 mg/dL                                                                                                                  | Other clinical definition              | 386,916 | 103   | - | - | - | -     | 6 |
| Gaudino (289)      | 2005 | Italy                                  | Prospective   | Adults   | 61.1 | 75   | Cardiac surgery                            | Cardiac surgery    | Need for RRT                                                                                                                                      | Other clinical definition              | 6,542   | 69    | - | - | - | 69    | 8 |
| Conlon (290)       | 2005 | USA                                    | Prospective   | Adults   | 65.1 | 66   | Cardiac surgery                            | Cardiac surgery    | rise in serum creatinine of 1 mg/dL above baseline postoperatively.                                                                               | Other clinical definition              | 798     | 82    | - | - | - | 3     | 7 |
| Thakar (291)       | 2005 | USA                                    | Prospective   | Adults   | NR   | 70   | Cardiac surgery                            | Cardiac surgery    | 30% or greater decline in postoperative GFR not requiring dialysis                                                                                | Other clinical definition              | 31,677  | 4,986 | - | - | - | 555   | 7 |
| Ostermann (292)    | 2005 | UK and Germany                         | Retrospective | Adults   | 60.5 | 64   | Intensive care unit                        | Critical care      | BUN > 22 mg/dL and sCr > 1.35 mg/dL and/or urine output < 800 mL/24 hours or 200 mL/6 hours                                                       | Other clinical definition              | 41,972  | 7,522 | - | - | - | 1747  | 6 |
| Karkouti (293)     | 2005 | Canada                                 | Prospective   | Adults   | 62.0 | 75   | Cardiac surgery                            | Cardiac surgery    | Need for RRT                                                                                                                                      | Other clinical definition              | 9,080   | 134   | - | - | - | 134   | 7 |
| Chu (294)          | 2005 | Hong Kong                              | Retrospective | Adults   | 39.0 | NR   | Severe acute respiratory distress syndrome | Hospital-acquired  | Increase in sCr by ≥ 30% or to > 1.8 mg/dL                                                                                                        | Other clinical definition              | 536     | 36    | - | - | - | 10    | 7 |
| Bell (295)         | 2005 | Sweden                                 | Retrospective | Adults   | NR   | 70*  | Medical intensive care unit                | Critical care      | Need for RRT                                                                                                                                      | Other clinical definition              | 8,152   | 207   | - | - | - | 207   | 7 |
| Khilji (296)       | 2004 | Pakistan                               | Retrospective | Adults   | NR   | NR   | Cardiac surgery                            | Cardiac surgery    | sCr > 1.6 mg/dL                                                                                                                                   | Other clinical definition              | 500     | 137   | - | - | - | -     | 7 |
| Miraoui (297)      | 2004 | Tunisia                                | Retrospective | Adults   | 56.0 | NR   | Intensive care unit                        | Critical care      | BUN > 84 mg/dL or sCr > 2 mg/dL or clearance < 50 mL/min                                                                                          | Other clinical definition              | 923     | 95    | - | - | - | -     | 7 |
| Wyatt (298)        | 2004 | USA                                    | Retrospective | Adults   | 51.7 | 67   | Non-renal solid organ transplantation      | Hospital-acquired  | ICD-9-CM diagnosis codes                                                                                                                          | Administrative coding-based definition | 519     | 130   | - | - | - | 42    | 6 |
| Srinivasan (299)   | 2004 | UK                                     | Retrospective | Adults   | 65.2 | 77   | Cardiac surgery                            | Cardiac surgery    | Post-operative increase in sCr to > 2.26 mg/dL or need for dialysis                                                                               | Other clinical definition              | 951     | 52    | - | - | - | -     | 8 |
| Mariani (300)      | 2004 | Italy                                  | Retrospective | Adults   | 63.0 | 85   | Cardiac surgery                            | Cardiac surgery    | Need for RRT                                                                                                                                      | Other clinical definition              | 569     | 12    | - | - | - | 12    | 6 |
| Bove (301)         | 2004 | Italy                                  | Prospective   | Adults   | 60.2 | 67   | Cardiac surgery                            | Cardiac surgery    | 100% increase in sCr                                                                                                                              | Other clinical definition              | 5,068   | 171   | - | - | - | 94    | 7 |
| Collins (302)      | 2004 | USA                                    | Retrospective | Adults   | 61.1 | 67   | Acute type A aortic dissection             | Cardiac surgery    | Need for RRT                                                                                                                                      | Other clinical definition              | 617     | 119   | - | - | - | 119   | 6 |
| Agras (303)        | 2004 | Turkey                                 | Retrospective | Children | 0.0* | 49*  | Neonatal                                   | Hospital-acquired  | sCr > 1.5 mg/dL                                                                                                                                   | Other clinical definition              | 1,311   | 45    | - | - | - | 10    | 6 |

|                 |      |                                      |               |          |       |     |                                                              |                     |                                                                                     |                                        |       |     |   |   |   |     |   |
|-----------------|------|--------------------------------------|---------------|----------|-------|-----|--------------------------------------------------------------|---------------------|-------------------------------------------------------------------------------------|----------------------------------------|-------|-----|---|---|---|-----|---|
| Moran (304)     | 2004 | USA                                  | Retrospective | Adults   | 57.0  | NR  | Free tissue transfer in setting of concomitant renal disease | Hospital-acquired   | ICD-9-CM diagnosis codes                                                            | Administrative coding-based definition | 1,053 | 3   | - | - | - | -   | 5 |
| Brown (305)     | 2004 | USA                                  | Retrospective | Adults   | 37.0  | 81  | Trauma                                                       | Trauma              | Peak sCr > 2 mg/dL                                                                  | Other clinical definition              | 2,083 | 217 | - | - | - | 97  | 6 |
| Paramesh (306)  | 2004 | USA                                  | Retrospective | Adults   | NR    | NR  | Orthotopic liver transplantation                             | Hospital-acquired   | Need for RRT                                                                        | Other clinical definition              | 1,602 | 350 | - | - | - | 350 | 6 |
| Mueller (307)   | 2004 | Switzerland                          | Prospective   | Adults   | 64.3  | 74  | Percutaneous coronary intervention                           | Nephrotoxins        | Post-procedure increase in sCr by $\geq$ 25% within 48 hours                        | Other clinical definition              | 1,383 | 139 | - | - | - | 2   | 6 |
| Stallwood (308) | 2004 | UK                                   | Retrospective | Adults   | 64.5  | 81  | Cardiac surgery                                              | Cardiac surgery     | Post-operative increase in sCr to > 2.26 mg/dL or need for RRT                      | Other clinical definition              | 2,199 | 53  | - | - | - | 19  | 6 |
| Esteban (309)   | 2004 | USA, Canada, South America, European | Prospective   | Adults   | 66.0  | 62  | Mechanical ventilation                                       | Critical care       | Increase in sCr to > 2 mg/dL, or sCr doubling (if preexisting CKD), or need for RRT | Other clinical definition              | 4,118 | 830 | - | - | - | -   | 7 |
| Michael (310)   | 2004 | USA                                  | Prospective   | Children | 13.0* | 54* | Stem cell transplantation                                    | Hematology/Oncology | Doubling of sCr                                                                     | Other clinical definition              | 272   | 29  | - | - | - | 14  | 7 |

NR denotes not reported; sCr, serum creatinine; RRT, renal replacement therapy; CKD, chronic kidney disease; NSAID, non-steroidal anti-inflammatory drug; ICD, international classification of diseases; CM, clinical modification; AKI, acute kidney injury; RIFLE, Risk, Injury, Failure, Loss, Endstage; pRIFLE, pediatric RIFLE; AKIN, Acute Kidney Injury Network; KDIGO, Kidney Disease Improving Global Outcomes; \* Values refer to patients with AKI and not the entire cohort.



## Supplemental References (Supplemental Table 4)

1. Slocum NK, Grossman PM, Moscucci M, et al.: The changing definition of contrast-induced nephropathy and its clinical implications: insights from the Blue Cross Blue Shield of Michigan Cardiovascular Consortium (BMC2). *Am Heart J* 163: 829-834, 2012
2. Ishikawa S, Griesdale DE and Lohser J: Acute kidney injury after lung resection surgery: incidence and perioperative risk factors. *Anesth Analg* 114: 1256-1262, 2012
3. Lellouche F, Dionne S, Simard S, Bussieres J and Dagenais F: High tidal volumes in mechanically ventilated patients increase organ dysfunction after cardiac surgery. *Anesthesiology* 116: 1072-1082, 2012
4. Lamy A, Devereaux PJ, Prabhakaran D, et al.: Off-pump or on-pump coronary-artery bypass grafting at 30 days. *N Engl J Med* 366: 1489-1497, 2012
5. Chong E, Shen L, Poh KK and Tan HC: Risk scoring system for prediction of contrast-induced nephropathy in patients with pre-existing renal impairment undergoing percutaneous coronary intervention. *Singapore Med J* 53: 164-169, 2012
6. Wu VC, Lai CF, Shiao CC, et al.: Effect of diuretic use on 30-day postdialysis mortality in critically ill patients receiving acute dialysis. *PLoS One* 7: e30836, 2012
7. Arnaoutakis GJ, George TJ, Kilic A, et al.: Risk factors for early death in patients bridged to transplant with continuous-flow left ventricular assist devices. *Ann Thorac Surg* 93: 1549-1554; discussion 1555, 2012
8. Ried M, Kobuch R, Rupprecht L, et al.: Reduced 30-day mortality in men after elective coronary artery bypass surgery with minimized extracorporeal circulation-a propensity score analysis. *BMC Cardiovasc Disord* 12: 17, 2012
9. Thakar CV, Parikh PJ and Liu Y: Acute kidney injury (AKI) and risk of readmissions in patients with heart failure. *Am J Cardiol* 109: 1482-1486, 2012
10. Bojan M, Vicca S, Boulat C, Gioanni S and Pouard P: Aprotinin, transfusions, and kidney injury in neonates and infants undergoing cardiac surgery. *Br J Anaesth* 108: 830-837, 2012
11. Selby NM, Crowley L, Fluck RJ, et al.: Use of electronic results reporting to diagnose and monitor AKI in hospitalized patients. *Clin J Am Soc Nephrol* 7: 533-540, 2012
12. Amin AP, Salisbury AC, McCullough PA, et al.: Trends in the incidence of acute kidney injury in patients hospitalized with acute myocardial infarction. *Arch Intern Med* 172: 246-253, 2012
13. Wohlaer MV, Sauaia A, Moore EE, Burlew CC, Banerjee A and Johnson J: Acute kidney injury and posttrauma multiple organ failure: the canary in the coal mine. *J Trauma Acute Care Surg* 72: 373-378; discussion 379-380, 2012
14. Ryden L, Ahnve S, Bell M, Hammar N, Ivert T and Holzmänn MJ: Acute kidney injury following coronary artery bypass grafting: early mortality and postoperative complications. *Scand Cardiovasc J* 46: 114-120, 2012
15. Patel UD, Garg AX, Krumholz HM, et al.: Preoperative serum brain natriuretic peptide and risk of acute kidney injury after cardiac surgery. *Circulation* 125: 1347-1355, 2012
16. Kim DY, Kobayashi L, Costantini TW, et al.: Is contrast exposure safe among the highest risk trauma patients? *J Trauma Acute Care Surg* 72: 61-66; discussion 66-67, 2012
17. Zhou J, Yang L, Zhang K, Liu Y and Fu P: Risk factors for the prognosis of acute kidney injury under the Acute Kidney Injury Network definition: a retrospective, multicenter study in critically ill patients. *Nephrology (Carlton)* 17: 330-337, 2012
18. Parolari A, Pesce LL, Pacini D, et al.: Risk factors for perioperative acute kidney injury after adult cardiac surgery: role of perioperative management. *Ann Thorac Surg* 93: 584-591, 2012

19. Sims AJ, Hussein HK, Prabhu M and Kanagasundaram NS: Are surrogate assumptions and use of diuretics associated with diagnosis and staging of acute kidney injury after cardiac surgery? *Clin J Am Soc Nephrol* 7: 15-23, 2012
20. Candela-Toha AM, Recio-Vazquez M, Delgado-Montero A, et al.: The calculation of baseline serum creatinine overestimates the diagnosis of acute kidney injury in patients undergoing cardiac surgery. *Nefrologia* 32: 53-58, 2012
21. Mehrotra A, Rose C, Pannu N, Gill J, Tonelli M and Gill JS: Incidence and consequences of acute kidney injury in kidney transplant recipients. *Am J Kidney Dis* 59: 558-565, 2012
22. Toth R, Breuer T, Cserep Z, et al.: Acute kidney injury is associated with higher morbidity and resource utilization in pediatric patients undergoing heart surgery. *Ann Thorac Surg* 93: 1984-1990, 2012
23. Liborio AB, Rocha NA, Oliveira MJ, et al.: Acute kidney injury in children with visceral leishmaniasis. *Pediatr Infect Dis J* 31: 451-454, 2012
24. Ried M, Haneya A, Kolat P, et al.: Acute renal dysfunction does not develop more frequently among octogenarians compared to septuagenarians after cardiac surgery. *Thorac Cardiovasc Surg* 60: 51-56, 2012
25. Fox CS, Muntner P, Chen AY, Alexander KP, Roe MT and Wiviott SD: Short-term outcomes of acute myocardial infarction in patients with acute kidney injury: a report from the national cardiovascular data registry. *Circulation* 125: 497-504, 2012
26. Stewart IJ, Tilley MA, Cotant CL, et al.: Association of AKI with adverse outcomes in burned military casualties. *Clin J Am Soc Nephrol* 7: 199-206, 2012
27. Garner AE, Lewington AJ and Barth JH: Detection of patients with acute kidney injury by the clinical laboratory using rises in serum creatinine: comparison of proposed definitions and a laboratory delta check. *Ann Clin Biochem* 49: 59-62, 2012
28. Craig DG, Bates CM, Davidson JS, Martin KG, Hayes PC and Simpson KJ: Staggered overdose pattern and delay to hospital presentation are associated with adverse outcomes following paracetamol-induced hepatotoxicity. *Br J Clin Pharmacol* 73: 285-294, 2012
29. Colpaert K, Hoste EA, Steurbaut K, et al.: Impact of real-time electronic alerting of acute kidney injury on therapeutic intervention and progression of RIFLE class. *Crit Care Med* 40: 1164-1170, 2012
30. Tolpin DA, Collard CD, Lee VV, et al.: Subclinical changes in serum creatinine and mortality after coronary artery bypass grafting. *J Thorac Cardiovasc Surg* 143: 682-688 e681, 2012
31. Coca SG, Jammalamadaka D, Sint K, et al.: Preoperative proteinuria predicts acute kidney injury in patients undergoing cardiac surgery. *J Thorac Cardiovasc Surg* 143: 495-502, 2012
32. Wehbe E, Brock R, Budev M, et al.: Short-term and long-term outcomes of acute kidney injury after lung transplantation. *J Heart Lung Transplant* 31: 244-251, 2012
33. Pedersen KR, Ravn HB, Povlsen JV, Schmidt MR, Erlandsen EJ and Hjortdal VE: Failure of remote ischemic preconditioning to reduce the risk of postoperative acute kidney injury in children undergoing operation for complex congenital heart disease: a randomized single-center study. *J Thorac Cardiovasc Surg* 143: 576-583, 2012
34. Viswanathan S, Manyam B, Azhibekov T and Mhanna MJ: Risk factors associated with acute kidney injury in extremely low birth weight (ELBW) infants. *Pediatr Nephrol* 27: 303-311, 2012
35. Blinder JJ, Goldstein SL, Lee VV, et al.: Congenital heart surgery in infants: effects of acute kidney injury on outcomes. *J Thorac Cardiovasc Surg* 143: 368-374, 2012
36. Han SS, Kang KJ, Kwon SJ, et al.: Additional role of urine output criterion in defining acute kidney injury. *Nephrol Dial Transplant* 27: 161-165, 2012
37. Haase M, Bellomo R, Story D, et al.: Effect of mean arterial pressure, haemoglobin and blood transfusion during cardiopulmonary bypass on post-operative acute kidney injury. *Nephrol Dial Transplant* 27: 153-160, 2012

38. Kavaz A, Ozcakar ZB, Kendirli T, Ozturk BB, Ekim M and Yalcinkaya F: Acute kidney injury in a paediatric intensive care unit: comparison of the pRIFLE and AKIN criteria. *Acta Paediatr* 101: e126-129, 2012
39. Girman CJ, Kou TD, Brodovicz K, et al.: Risk of acute renal failure in patients with Type 2 diabetes mellitus. *Diabet Med* 29: 614-621, 2012
40. Brown JR, Kramer RS, Coca SG and Parikh CR: The prognostic value of using the duration of acute kidney injury in cardiac surgery: an example using two antifibrinolytics. *J Extra Corpor Technol* 43: 227-231, 2011
41. Jiang F, Chen YH, Liang XL, et al.: [The sensitivity and accuracy of RIFLE and AKIN criteria for acute kidney injury diagnosis in intensive care unit patients]. *Zhongguo Wei Zhong Bing Ji Jiu Yi Xue* 23: 759-762, 2011
42. Stallworth JR, Tripathi A and Jerrell JM: Prevalence, treatment, and outcomes of renal conditions in pediatric sickle cell disease. *South Med J* 104: 752-756, 2011
43. Cartin-Ceba R, Kojicic M, Li G, et al.: Epidemiology of critical care syndromes, organ failures, and life-support interventions in a suburban US community. *Chest* 140: 1447-1455, 2011
44. Thakar CV, Christianson A, Himmelfarb J and Leonard AC: Acute kidney injury episodes and chronic kidney disease risk in diabetes mellitus. *Clin J Am Soc Nephrol* 6: 2567-2572, 2011
45. Acetylcysteine for prevention of renal outcomes in patients undergoing coronary and peripheral vascular angiography: main results from the randomized Acetylcysteine for Contrast-induced nephropathy Trial (ACT). *Circulation* 124: 1250-1259, 2011
46. Mitchell AM, Jones AE, Tumlin JA and Kline JA: Immediate complications of intravenous contrast for computed tomography imaging in the outpatient setting are rare. *Acad Emerg Med* 18: 1005-1009, 2011
47. Ried M, Puehler T, Haneya A, Schmid C and Diez C: Acute kidney injury in septua- and octogenarians after cardiac surgery. *BMC Cardiovasc Disord* 11: 52, 2011
48. Wu VC, Huang TM, Lai CF, et al.: Acute-on-chronic kidney injury at hospital discharge is associated with long-term dialysis and mortality. *Kidney Int* 80: 1222-1230, 2011
49. Meier P, Bonfils RM, Vogt B, Burnand B and Burnier M: Referral patterns and outcomes in noncritically ill patients with hospital-acquired acute kidney injury. *Clin J Am Soc Nephrol* 6: 2215-2225, 2011
50. Lahoti A, Nates JL, Wakefield CD, Price KJ and Salahudeen AK: Costs and outcomes of acute kidney injury in critically ill patients with cancer. *J Support Oncol* 9: 149-155, 2011
51. Lu RH, Fang Y, Gao JY, et al.: [Analysis of incidence and risk factor in hospitalized patients with acute kidney injury]. *Zhongguo Wei Zhong Bing Ji Jiu Yi Xue* 23: 413-417, 2011
52. Liu KD, Thompson BT, Ancukiewicz M, et al.: Acute kidney injury in patients with acute lung injury: impact of fluid accumulation on classification of acute kidney injury and associated outcomes. *Crit Care Med* 39: 2665-2671, 2011
53. Karkouti K, Wijeyesundera DN, Yau TM, et al.: Influence of erythrocyte transfusion on the risk of acute kidney injury after cardiac surgery differs in anemic and nonanemic patients. *Anesthesiology* 115: 523-530, 2011
54. Mandelbaum T, Scott DJ, Lee J, et al.: Outcome of critically ill patients with acute kidney injury using the Acute Kidney Injury Network criteria. *Crit Care Med* 39: 2659-2664, 2011
55. Lombardi R, Nin N, Lorente JA, et al.: An assessment of the Acute Kidney Injury Network creatinine-based criteria in patients submitted to mechanical ventilation. *Clin J Am Soc Nephrol* 6: 1547-1555, 2011
56. Barbosa RR, Cestari PF, Capeletti JT, et al.: Impact of renal failure on in-hospital outcomes after coronary artery bypass surgery. *Arq Bras Cardiol* 97: 249-253, 2011
57. Alkandari O, Eddington KA, Hyder A, et al.: Acute kidney injury is an independent risk factor for pediatric intensive care unit mortality, longer length of stay and prolonged mechanical ventilation in critically ill children: a two-center retrospective cohort study. *Crit Care* 15: R146, 2011

58. Wi J, Ko YG, Kim JS, et al.: Impact of contrast-induced acute kidney injury with transient or persistent renal dysfunction on long-term outcomes of patients with acute myocardial infarction undergoing percutaneous coronary intervention. *Heart* 97: 1753-1757, 2011
59. Shlipak MG, Coca SG, Wang Z, et al.: Presurgical serum cystatin C and risk of acute kidney injury after cardiac surgery. *Am J Kidney Dis* 58: 366-373, 2011
60. Piccinni P, Cruz DN, Gramaticopolo S, et al.: Prospective multicenter study on epidemiology of acute kidney injury in the ICU: a critical care nephrology Italian collaborative effort (NEFROINT). *Minerva Anestesiol* 77: 1072-1083, 2011
61. Clec'h C, Gonzalez F, Lautrette A, et al.: Multiple-center evaluation of mortality associated with acute kidney injury in critically ill patients: a competing risks analysis. *Crit Care* 15: R128, 2011
62. Budano C, Levis M, D'Amico M, et al.: Impact of contrast-induced acute kidney injury definition on clinical outcomes. *Am Heart J* 161: 963-971, 2011
63. Pannu N, James M, Hemmelgarn BR, Dong J, Tonelli M and Klarenbach S: Modification of outcomes after acute kidney injury by the presence of CKD. *Am J Kidney Dis* 58: 206-213, 2011
64. Turker G, Ozsoy G, Gunlemmez A, Gokalp AS, Arisoy AE and Bircan Z: Acute renal failure SNAPPE and mortality. *Pediatr Int* 53: 483-488, 2011
65. Hwang SH, Jeong MH, Ahmed K, et al.: Different clinical outcomes of acute kidney injury according to acute kidney injury network criteria in patients between ST elevation and non-ST elevation myocardial infarction. *Int J Cardiol* 150: 99-101, 2011
66. Zhong XH, Ding J, Liu XY, Xiao HJ, Yao Y and Huang JP: [Clinical analysis of acute kidney injury in children with renal diseases]. *Zhonghua Er Ke Za Zhi* 49: 60-65, 2011
67. Cho A, Lee JE, Kwon GY, et al.: Post-operative acute kidney injury in patients with renal cell carcinoma is a potent risk factor for new-onset chronic kidney disease after radical nephrectomy. *Nephrol Dial Transplant* 26: 3496-3501, 2011
68. Pettita V, Webb SA, Bailey M, Howe B, Seppelt IM and Bellomo R: Acute kidney injury in patients with influenza A (H1N1) 2009. *Intensive Care Med* 37: 763-767, 2011
69. Grams ME, Estrella MM, Coresh J, Brower RG and Liu KD: Fluid balance, diuretic use, and mortality in acute kidney injury. *Clin J Am Soc Nephrol* 6: 966-973, 2011
70. van Kuijk JP, Flu WJ, Valentijn TM, et al.: Preoperative left ventricular dysfunction predisposes to postoperative acute kidney injury and long-term mortality. *J Nephrol* 24: 764-770, 2011
71. Licker M, Cartier V, Robert J, et al.: Risk factors of acute kidney injury according to RIFLE criteria after lung cancer surgery. *Ann Thorac Surg* 91: 844-850, 2011
72. Choi NK, Chang Y, Jung SY, et al.: A population-based case-crossover study of polyethylene glycol use and acute renal failure risk in the elderly. *World J Gastroenterol* 17: 651-656, 2011
73. Martin-Loeches I, Papiol E, Rodriguez A, et al.: Acute kidney injury in critical ill patients affected by influenza A (H1N1) virus infection. *Crit Care* 15: R66, 2011
74. Ishani A, Nelson D, Clothier B, et al.: The magnitude of acute serum creatinine increase after cardiac surgery and the risk of chronic kidney disease, progression of kidney disease, and death. *Arch Intern Med* 171: 226-233, 2011
75. Krawczeski CD, Woo JG, Wang Y, Bennett MR, Ma Q and Devarajan P: Neutrophil gelatinase-associated lipocalin concentrations predict development of acute kidney injury in neonates and children after cardiopulmonary bypass. *J Pediatr* 158: 1009-1015 e1001, 2011
76. Pompilio G, Filippini S, Agrifoglio M, et al.: Determinants of pericardial drainage for cardiac tamponade following cardiac surgery. *Eur J Cardiothorac Surg* 39: e107-113, 2011
77. Ali T, Tachibana A, Khan I, et al.: The changing pattern of referral in acute kidney injury. *QJM* 104: 497-503, 2011

78. Mithani S, Kuskowski M, Slinin Y, Ishani A, McFalls E and Adabag S: Dose-dependent effect of statins on the incidence of acute kidney injury after cardiac surgery. *Ann Thorac Surg* 91: 520-525, 2011
79. Lin HY, Lai JJ, Lai YC, Lin PC, Chang SC and Tang GJ: Acute renal failure in severe pancreatitis: A population-based study. *Ups J Med Sci* 116: 155-159, 2011
80. James MT, Ghali WA, Knudtson ML, et al.: Associations between acute kidney injury and cardiovascular and renal outcomes after coronary angiography. *Circulation* 123: 409-416, 2011
81. Englberger L, Suri RM, Li Z, et al.: Clinical accuracy of RIFLE and Acute Kidney Injury Network (AKIN) criteria for acute kidney injury in patients undergoing cardiac surgery. *Crit Care* 15: R16, 2011
82. Garzotto F, Piccinni P, Cruz D, et al.: RIFLE-based data collection/management system applied to a prospective cohort multicenter Italian study on the epidemiology of acute kidney injury in the intensive care unit. *Blood Purif* 31: 159-171, 2011
83. Moffett BS and Goldstein SL: Acute kidney injury and increasing nephrotoxic-medication exposure in noncritically-ill children. *Clin J Am Soc Nephrol* 6: 856-863, 2011
84. Bolesta S, Uhrin LM and Guzek JR: Preoperative statins and acute kidney injury after cardiac surgery: utilization of a consensus definition of acute kidney injury. *Ann Pharmacother* 45: 23-30, 2011
85. Noyez L: Influence of the definition of acute renal failure post-cardiac surgery on incidence, patient identification, and identification of risk factors. *Eur J Cardiothorac Surg* 39: e8-12, 2011
86. Huang TM, Wu VC, Young GH, et al.: Preoperative proteinuria predicts adverse renal outcomes after coronary artery bypass grafting. *J Am Soc Nephrol* 22: 156-163, 2011
87. Du Y, Zappitelli M, Mian A, et al.: Urinary biomarkers to detect acute kidney injury in the pediatric emergency center. *Pediatr Nephrol* 26: 267-274, 2011
88. Kimura T, Obi Y, Yasuda K, et al.: Effects of chronic kidney disease and post-angiographic acute kidney injury on long-term prognosis after coronary artery angiography. *Nephrol Dial Transplant* 26: 1838-1846, 2011
89. de Geus HR, Bakker J, Lesaffre EM and le Noble JL: Neutrophil gelatinase-associated lipocalin at ICU admission predicts for acute kidney injury in adult patients. *Am J Respir Crit Care Med* 183: 907-914, 2011
90. Li SY, Chen JY, Yang WC and Chuang CL: Acute kidney injury network classification predicts in-hospital and long-term mortality in patients undergoing elective coronary artery bypass grafting surgery. *Eur J Cardiothorac Surg* 39: 323-328, 2011
91. Fonseca Ruiz NJ, Castro DP, Guerra AM, Saldarriaga FM and Hernandez JD: Renal injury study in critical ill patients in accordance with the new definition given by the Acute Kidney Injury Network. *J Crit Care* 26: 206-212, 2011
92. Zappitelli M, Moffett BS, Hyder A and Goldstein SL: Acute kidney injury in non-critically ill children treated with aminoglycoside antibiotics in a tertiary healthcare centre: a retrospective cohort study. *Nephrol Dial Transplant* 26: 144-150, 2011
93. Paden ML, Warshaw BL, Heard ML and Fortenberry JD: Recovery of renal function and survival after continuous renal replacement therapy during extracorporeal membrane oxygenation. *Pediatr Crit Care Med* 12: 153-158, 2011
94. Englberger L, Suri RM, Greason KL, et al.: Deep hypothermic circulatory arrest is not a risk factor for acute kidney injury in thoracic aortic surgery. *J Thorac Cardiovasc Surg* 141: 552-558, 2011
95. Askenazi DJ, Ambalavanan N, Hamilton K, et al.: Acute kidney injury and renal replacement therapy independently predict mortality in neonatal and pediatric noncardiac patients on extracorporeal membrane oxygenation. *Pediatr Crit Care Med* 12: e1-6, 2011
96. Ostermann M and Chang RW: Challenges of defining acute kidney injury. *QJM* 104: 237-243, 2011
97. Amin AP, Spertus JA, Reid KJ, et al.: The prognostic importance of worsening renal function during an acute myocardial infarction on long-term mortality. *Am Heart J* 160: 1065-1071, 2010

98. Mehta RH, Honeycutt E, Patel UD, et al.: Impact of recovery of renal function on long-term mortality after coronary artery bypass grafting. *Am J Cardiol* 106: 1728-1734, 2010
99. Robert AM, Kramer RS, Dacey LJ, et al.: Cardiac surgery-associated acute kidney injury: a comparison of two consensus criteria. *Ann Thorac Surg* 90: 1939-1943, 2010
100. James MT, Hemmelgarn BR, Wiebe N, et al.: Glomerular filtration rate, proteinuria, and the incidence and consequences of acute kidney injury: a cohort study. *Lancet* 376: 2096-2103, 2010
101. Vannaphan S, Walters N, Saengnedasawang T, et al.: Factors associated with acute renal failure in severe falciparum [corrected] malaria patients. *Southeast Asian J Trop Med Public Health* 41: 1042-1047, 2010
102. Iglesias JI, DePalma JA and Levine JS: Risk factors for acute kidney injury following orthotopic liver transplantation: the impact of changes in renal function while patients await transplantation. *BMC Nephrol* 11: 30, 2010
103. Silva Junior GB, Liborio AB, Mota RM, et al.: Acute kidney injury in AIDS: frequency, RIFLE classification and outcome. *Braz J Med Biol Res* 43: 1102-1108, 2010
104. Brown JR, Kramer RS, Coca SG and Parikh CR: Duration of acute kidney injury impacts long-term survival after cardiac surgery. *Ann Thorac Surg* 90: 1142-1148, 2010
105. Yende S, van der Poll T, Lee M, et al.: The influence of pre-existing diabetes mellitus on the host immune response and outcome of pneumonia: analysis of two multicentre cohort studies. *Thorax* 65: 870-877, 2010
106. Hennessy SA, LaPar DJ, Stukenborg GJ, et al.: Cardiac catheterization within 24 hours of valve surgery is significantly associated with acute renal failure. *J Thorac Cardiovasc Surg* 140: 1011-1017, 2010
107. Fang Y, Ding X, Zhong Y, et al.: Acute kidney injury in a Chinese hospitalized population. *Blood Purif* 30: 120-126, 2010
108. D'Onofrio A, Cruz D, Bolgan I, et al.: RIFLE criteria for cardiac surgery-associated acute kidney injury: risk factors and outcomes. *Congest Heart Fail* 16 Suppl 1: S32-36, 2010
109. Coca SG, King JT, Jr., Rosenthal RA, Perkal MF and Parikh CR: The duration of postoperative acute kidney injury is an additional parameter predicting long-term survival in diabetic veterans. *Kidney Int* 78: 926-933, 2010
110. Lafrance JP and Miller DR: Defining acute kidney injury in database studies: the effects of varying the baseline kidney function assessment period and considering CKD status. *Am J Kidney Dis* 56: 651-660, 2010
111. Ibrahim F, Naftalin C, Cheserem E, et al.: Immunodeficiency and renal impairment are risk factors for HIV-associated acute renal failure. *AIDS* 24: 2239-2244, 2010
112. Ingraham AM, Xiong W, Hemmilla MR, et al.: The attributable mortality and length of stay of trauma-related complications: a matched cohort study. *Ann Surg* 252: 358-362, 2010
113. Kwon SH, Noh H, Jeon JS, Kim Y and Han DC: An assessment of AKIN criteria for hospital-acquired acute kidney injury: a prospective observational cohort study. *Nephron Clin Pract* 116: c217-223, 2010
114. Soto K, Coelho S, Rodrigues B, et al.: Cystatin C as a marker of acute kidney injury in the emergency department. *Clin J Am Soc Nephrol* 5: 1745-1754, 2010
115. Lahoti A, Kantarjian H, Salahudeen AK, et al.: Predictors and outcome of acute kidney injury in patients with acute myelogenous leukemia or high-risk myelodysplastic syndrome. *Cancer* 116: 4063-4068, 2010
116. Bihorac A, Delano MJ, Schold JD, et al.: Incidence, clinical predictors, genomics, and outcome of acute kidney injury among trauma patients. *Ann Surg* 252: 158-165, 2010
117. Fisher BT, Zaoutis TE, Leckerman KH, Localio R and Aplenc R: Risk factors for renal failure in pediatric patients with acute myeloid leukemia: a retrospective cohort study. *Pediatr Blood Cancer* 55: 655-661, 2010
118. Choi AI, Li Y, Parikh C, Volberding PA and Shlipak MG: Long-term clinical consequences of acute kidney injury in the HIV-infected. *Kidney Int* 78: 478-485, 2010

119. Szczech LA, Granger CB, Dasta JF, et al.: Acute kidney injury and cardiovascular outcomes in acute severe hypertension. *Circulation* 121: 2183-2191, 2010
120. Akram AR, Singanayagam A, Choudhury G, Mandal P, Chalmers JD and Hill AT: Incidence and prognostic implications of acute kidney injury on admission in patients with community-acquired pneumonia. *Chest* 138: 825-832, 2010
121. Romano G, Mastroianni C, Bancone C, et al.: Leukoreduction program for red blood cell transfusions in coronary surgery: association with reduced acute kidney injury and in-hospital mortality. *J Thorac Cardiovasc Surg* 140: 188-195, 2010
122. Shema-Didi L, Ore L, Geron R and Kristal B: Is anemia at hospital admission associated with in-hospital acute kidney injury occurrence? *Nephron Clin Pract* 115: c168-176, 2010
123. Mitter N, Shah A, Yuh D, et al.: Renal injury is associated with operative mortality after cardiac surgery for women and men. *J Thorac Cardiovasc Surg* 140: 1367-1373, 2010
124. Argalious M, Xu M, Sun Z, Smedira N and Koch CG: Preoperative statin therapy is not associated with a reduced incidence of postoperative acute kidney injury after cardiac surgery. *Anesth Analg* 111: 324-330, 2010
125. Laoprasopwattana K, Pruekprasert P, Dissaneewate P, Geater A and Vachvanichsanong P: Outcome of dengue hemorrhagic fever-caused acute kidney injury in Thai children. *J Pediatr* 157: 303-309, 2010
126. Matheny ME, Miller RA, Ikizler TA, et al.: Development of inpatient risk stratification models of acute kidney injury for use in electronic health records. *Med Decis Making* 30: 639-650, 2010
127. De Santo LS, Romano G, Galdieri N, et al.: RIFLE criteria for acute kidney injury in valvular surgery. *J Heart Valve Dis* 19: 139-147; discussion 148, 2010
128. Santiago MJ, Lopez-Herce J, Urbano J, et al.: Clinical course and mortality risk factors in critically ill children requiring continuous renal replacement therapy. *Intensive Care Med* 36: 843-849, 2010
129. Gude E, Andreassen AK, Arora S, et al.: Acute renal failure early after heart transplantation: risk factors and clinical consequences. *Clin Transplant* 24: E207-213, 2010
130. Morgan DJ and Ho KM: A comparison of nonoliguric and oliguric severe acute kidney injury according to the risk injury failure loss end-stage (RIFLE) criteria. *Nephron Clin Pract* 115: c59-65, 2010
131. Jyrala A, Weiss RE, Jeffries RA and Kay GL: Effect of mild renal dysfunction (s-crea 1.2-2.2 mg/dl) on presentation characteristics and short- and long-term outcomes of on-pump cardiac surgery patients. *Interact Cardiovasc Thorac Surg* 10: 777-782, 2010
132. Ahmed AA, Hays CI, Liu B, et al.: Predictors of in-hospital mortality among hospitalized nursing home residents: an analysis of the National Hospital Discharge Surveys 2005-2006. *J Am Med Dir Assoc* 11: 52-58, 2010
133. Schneider J, Khemani R, Grushkin C and Bart R: Serum creatinine as stratified in the RIFLE score for acute kidney injury is associated with mortality and length of stay for children in the pediatric intensive care unit. *Crit Care Med* 38: 933-939, 2010
134. Lafrance JP, Djurdjev O and Levin A: Incidence and outcomes of acute kidney injury in a referred chronic kidney disease cohort. *Nephrol Dial Transplant* 25: 2203-2209, 2010
135. Uchino S, Bellomo R, Bagshaw SM and Goldsmith D: Transient azotaemia is associated with a high risk of death in hospitalized patients. *Nephrol Dial Transplant* 25: 1833-1839, 2010
136. Hsu CY, Huang YH, Su CW, et al.: Transarterial chemoembolization in patients with hepatocellular carcinoma and renal insufficiency. *J Clin Gastroenterol* 44: e171-177, 2010
137. Kong FY, Tao WD, Hao ZL and Liu M: Predictors of one-year disability and death in Chinese hospitalized women after ischemic stroke. *Cerebrovasc Dis* 29: 255-262, 2010
138. Gordon AC, Russell JA, Walley KR, et al.: The effects of vasopressin on acute kidney injury in septic shock. *Intensive Care Med* 36: 83-91, 2010

139. Ferreira AC, Nolasco F, Carvalho D, et al.: Impact of RIFLE classification in liver transplantation. *Clin Transplant* 24: 394-400, 2010
140. Heise D, Sundermann D, Braeuer A and Quintel M: Validation of a clinical score to determine the risk of acute renal failure after cardiac surgery. *Eur J Cardiothorac Surg* 37: 710-716, 2010
141. Hsu CY, Huang YH, Su CW, et al.: Renal failure in patients with hepatocellular carcinoma and ascites undergoing transarterial chemoembolization. *Liver Int* 30: 77-84, 2010
142. Thakar CV, Christianson A, Freyberg R, Almenoff P and Render ML: Incidence and outcomes of acute kidney injury in intensive care units: a Veterans Administration study. *Crit Care Med* 37: 2552-2558, 2009
143. Rodrigues AJ, Evora PR, Bassetto S, et al.: Risk factors for acute renal failure after heart surgery. *Rev Bras Cir Cardiovasc* 24: 441-446, 2009
144. Lau DH, Huynh LT, Chew DP, Astley CM, Soman A and Sanders P: Prognostic impact of types of atrial fibrillation in acute coronary syndromes. *Am J Cardiol* 104: 1317-1323, 2009
145. Yan XL, Li Q, Hou XT, et al.: [Postoperative acute renal failure in adult patients with cardiac surgery: evaluation of the RIFLE classification]. *Zhonghua Yi Xue Za Zhi* 89: 1766-1769, 2009
146. Machado MN, Miranda RC, Takakura IT, et al.: Acute kidney injury after on-pump coronary artery bypass graft surgery. *Arq Bras Cardiol* 93: 247-252, 2009
147. Li JH, Wang NS, Wang F, Xiang HY, Wu HL and Wu QM: Acute renal failure in hospitalized patients in China: a prospective study. *Ren Fail* 31: 431-437, 2009
148. Slankamenac K, Breitenstein S, Held U, Beck-Schimmer B, Puhan MA and Clavien PA: Development and validation of a prediction score for postoperative acute renal failure following liver resection. *Ann Surg* 250: 720-728, 2009
149. Wu CT, Huang JL, Lin JJ and Hsia SH: Factors associated with nontraumatic rhabdomyolysis and acute renal failure of children in Taiwan population. *Pediatr Emerg Care* 25: 657-660, 2009
150. Stamou SC, Reames MK, Skipper E, et al.: Aprotinin in cardiac surgery patients: is the risk worth the benefit? *Eur J Cardiothorac Surg* 36: 869-875, 2009
151. Saddadi F, Hakemi M, Najafi I, et al.: Chronic kidney disease after hematopoietic cell transplantation: frequency, risk factors, and outcomes. *Transplant Proc* 41: 2895-2897, 2009
152. Cartin-Ceba R, Haugen EN, Iscimen R, Trillo-Alvarez C, Juncos L and Gajic O: Evaluation of "Loss" and "End stage renal disease" after acute kidney injury defined by the Risk, Injury, Failure, Loss and ESRD classification in critically ill patients. *Intensive Care Med* 35: 2087-2095, 2009
153. Amdur RL, Chawla LS, Amodeo S, Kimmel PL and Palant CE: Outcomes following diagnosis of acute renal failure in U.S. veterans: focus on acute tubular necrosis. *Kidney Int* 76: 1089-1097, 2009
154. Nicoara A, Patel UD, Phillips-Bute BG, et al.: Mortality trends associated with acute renal failure requiring dialysis after CABG surgery in the United States. *Blood Purif* 28: 359-363, 2009
155. Soltani A, Karsidag S and Garner W: A ten-year experience with hemodialysis in burn patients at Los Angeles County + USC Medical Center. *J Burn Care Res* 30: 832-835, 2009
156. Costantini TW, Fraga G, Fortlage D, et al.: Redefining renal dysfunction in trauma: implementation of the Acute Kidney Injury Network staging system. *J Trauma* 67: 283-287; discussion 287-288, 2009
157. De Santo L, Romano G, Della Corte A, et al.: Preoperative anemia in patients undergoing coronary artery bypass grafting predicts acute kidney injury. *J Thorac Cardiovasc Surg* 138: 965-970, 2009
158. Zappitelli M, Bernier PL, Saczkowski RS, et al.: A small post-operative rise in serum creatinine predicts acute kidney injury in children undergoing cardiac surgery. *Kidney Int* 76: 885-892, 2009
159. Lo LJ, Go AS, Chertow GM, et al.: Dialysis-requiring acute renal failure increases the risk of progressive chronic kidney disease. *Kidney Int* 76: 893-899, 2009

160. Haider AH, Crompton JG, Oyetunji T, et al.: Females have fewer complications and lower mortality following trauma than similarly injured males: a risk adjusted analysis of adults in the National Trauma Data Bank. *Surgery* 146: 308-315, 2009
161. Joannidis M, Metnitz B, Bauer P, et al.: Acute kidney injury in critically ill patients classified by AKIN versus RIFLE using the SAPS 3 database. *Intensive Care Med* 35: 1692-1702, 2009
162. Manrique A, Jooste EH, Kuch BA, et al.: The association of renal dysfunction and the use of aprotinin in patients undergoing congenital cardiac surgery requiring cardiopulmonary bypass. *Anesth Analg* 109: 45-52, 2009
163. Ahmadi H, Karimi A, Davoodi S, et al.: Determinant factors of renal failure after coronary artery bypass grafting with on-pump technique. *Med Princ Pract* 18: 300-304, 2009
164. Yuan F, Hou FF, Wu Q, Chen PY, Xie D and Zhang X: Natural history and impact on outcomes of acute kidney injury in patients with road traffic injury. *Clin Nephrol* 71: 669-679, 2009
165. Abelha FJ, Botelho M, Fernandes V and Barros H: Determinants of postoperative acute kidney injury. *Crit Care* 13: R79, 2009
166. Zacharia BE, Ducruet AF, Hickman ZL, et al.: Renal dysfunction as an independent predictor of outcome after aneurysmal subarachnoid hemorrhage: a single-center cohort study. *Stroke* 40: 2375-2381, 2009
167. Hauer D, Kilger E, Kaufmann I, et al.: Risk and outcome analysis of renal replacement therapies in patients after cardiac surgery with pre-operatively normal renal function. *Anaesthesia* 64: 615-619, 2009
168. Metz LI, LeBeau ME, Zlabek JA and Mathiason MA: Acute renal failure in patients undergoing cardiothoracic surgery in a community hospital. *WMJ* 108: 109-114, 2009
169. Hsu CY, Chertow GM, McCulloch CE, Fan D, Ordonez JD and Go AS: Nonrecovery of kidney function and death after acute on chronic renal failure. *Clin J Am Soc Nephrol* 4: 891-898, 2009
170. Hobson CE, Yavas S, Segal MS, et al.: Acute kidney injury is associated with increased long-term mortality after cardiothoracic surgery. *Circulation* 119: 2444-2453, 2009
171. Bihorac A, Yavas S, Subbiah S, et al.: Long-term risk of mortality and acute kidney injury during hospitalization after major surgery. *Ann Surg* 249: 851-858, 2009
172. Kajimoto K, Miyauchi K, Kasai T, et al.: Metabolic syndrome is an independent risk factor for stroke and acute renal failure after coronary artery bypass grafting. *J Thorac Cardiovasc Surg* 137: 658-663, 2009
173. Antunes PE, de Oliveira JF and Antunes MJ: Risk-prediction for postoperative major morbidity in coronary surgery. *Eur J Cardiothorac Surg* 35: 760-766; discussion 766-767, 2009
174. Esper AM, Moss M and Martin GS: The effect of diabetes mellitus on organ dysfunction with sepsis: an epidemiological study. *Crit Care* 13: R18, 2009
175. Kheterpal S, Tremper KK, Heung M, et al.: Development and validation of an acute kidney injury risk index for patients undergoing general surgery: results from a national data set. *Anesthesiology* 110: 505-515, 2009
176. Tsagalis G, Akrivos T, Alevizaki M, et al.: Long-term prognosis of acute kidney injury after first acute stroke. *Clin J Am Soc Nephrol* 4: 616-622, 2009
177. Georgiou C, Inaba K, Teixeira PG, et al.: Cirrhosis and trauma are a lethal combination. *World J Surg* 33: 1087-1092, 2009
178. Huffmyer JL, Mauermann WJ, Thiele RH, Ma JZ and Nemergut EC: Preoperative statin administration is associated with lower mortality and decreased need for postoperative hemodialysis in patients undergoing coronary artery bypass graft surgery. *J Cardiothorac Vasc Anesth* 23: 468-473, 2009
179. Bagshaw SM, Lapinsky S, Dial S, et al.: Acute kidney injury in septic shock: clinical outcomes and impact of duration of hypotension prior to initiation of antimicrobial therapy. *Intensive Care Med* 35: 871-881, 2009

180. Ishani A, Xue JL, Himmelfarb J, et al.: Acute kidney injury increases risk of ESRD among elderly. *J Am Soc Nephrol* 20: 223-228, 2009
181. Silva GB, Jr., Monteiro FA, Mota RM, et al.: Acute kidney injury requiring dialysis in obstetric patients: a series of 55 cases in Brazil. *Arch Gynecol Obstet* 279: 131-137, 2009
182. Lecomte P, Van Vlem B, Coddens J, et al.: Tight perioperative glucose control is associated with a reduction in renal impairment and renal failure in non-diabetic cardiac surgical patients. *Crit Care* 12: R154, 2008
183. Ostermann M and Chang R: Correlation between the AKI classification and outcome. *Crit Care* 12: R144, 2008
184. Benedetto U, Sciarretta S, Roscitano A, et al.: Preoperative Angiotensin-converting enzyme inhibitors and acute kidney injury after coronary artery bypass grafting. *Ann Thorac Surg* 86: 1160-1165, 2008
185. Lopes JA, Fernandes P, Jorge S, et al.: Acute kidney injury in intensive care unit patients: a comparison between the RIFLE and the Acute Kidney Injury Network classifications. *Crit Care* 12: R110, 2008
186. Arora P, Rajagopalam S, Ranjan R, et al.: Preoperative use of angiotensin-converting enzyme inhibitors/angiotensin receptor blockers is associated with increased risk for acute kidney injury after cardiovascular surgery. *Clin J Am Soc Nephrol* 3: 1266-1273, 2008
187. Bagshaw SM, George C, Gibney RT and Bellomo R: A multi-center evaluation of early acute kidney injury in critically ill trauma patients. *Ren Fail* 30: 581-589, 2008
188. Roe J, Campbell LJ, Ibrahim F, Hendry BM and Post FA: HIV care and the incidence of acute renal failure. *Clin Infect Dis* 47: 242-249, 2008
189. Payen D, de Pont AC, Sakr Y, Spies C, Reinhart K and Vincent JL: A positive fluid balance is associated with a worse outcome in patients with acute renal failure. *Crit Care* 12: R74, 2008
190. Plotz FB, Bouma AB, van Wijk JA, Kneyber MC and Bokenkamp A: Pediatric acute kidney injury in the ICU: an independent evaluation of pRIFLE criteria. *Intensive Care Med* 34: 1713-1717, 2008
191. Nickolas TL, O'Rourke MJ, Yang J, et al.: Sensitivity and specificity of a single emergency department measurement of urinary neutrophil gelatinase-associated lipocalin for diagnosing acute kidney injury. *Ann Intern Med* 148: 810-819, 2008
192. Perez Valdivieso JR, Bes-Rastrollo M, Monedero P, De Irala J and Lavilla FJ: Evaluation of the prognostic value of the risk, injury, failure, loss and end-stage renal failure (RIFLE) criteria for acute kidney injury. *Nephrology (Carlton)* 13: 361-366, 2008
193. Candela-Toha A, Elias-Martin E, Abaira V, et al.: Predicting acute renal failure after cardiac surgery: external validation of two new clinical scores. *Clin J Am Soc Nephrol* 3: 1260-1265, 2008
194. Pedersen KR, Hjortdal VE, Christensen S, et al.: Clinical outcome in children with acute renal failure treated with peritoneal dialysis after surgery for congenital heart disease. *Kidney Int Suppl*: S81-86, 2008
195. Athappan G, Balaji MV, Navaneethan U and Thirumalikulundusubramanian P: Acute renal failure in snake envenomation: a large prospective study. *Saudi J Kidney Dis Transpl* 19: 404-410, 2008
196. Garcia-Rodriguez LA, Masso-Gonzalez EL, Wallander MA and Johansson S: The safety of rosuvastatin in comparison with other statins in over 100,000 statin users in UK primary care. *Pharmacoepidemiol Drug Saf* 17: 943-952, 2008
197. Garcia-Rodriguez LA, Gonzalez-Perez A, Stang MR, Wallander MA and Johansson S: The safety of rosuvastatin in comparison with other statins in over 25,000 statin users in the Saskatchewan Health Databases. *Pharmacoepidemiol Drug Saf* 17: 953-961, 2008
198. Zappitelli M, Parikh CR, Akcan-Arikan A, Washburn KK, Moffett BS and Goldstein SL: Ascertainment and epidemiology of acute kidney injury varies with definition interpretation. *Clin J Am Soc Nephrol* 3: 948-954, 2008

199. Bagshaw SM, George C and Bellomo R: Early acute kidney injury and sepsis: a multicentre evaluation. *Crit Care* 12: R47, 2008
200. Hsu CY, Ordonez JD, Chertow GM, Fan D, McCulloch CE and Go AS: The risk of acute renal failure in patients with chronic kidney disease. *Kidney Int* 74: 101-107, 2008
201. Lassnigg A, Schmid ER, Hiesmayr M, et al.: Impact of minimal increases in serum creatinine on outcome in patients after cardiothoracic surgery: do we have to revise current definitions of acute renal failure? *Crit Care Med* 36: 1129-1137, 2008
202. Lima RS, Marques CN, Silva Junior GB, et al.: Comparison between early and delayed acute kidney injury secondary to infectious disease in the intensive care unit. *Int Urol Nephrol* 40: 731-739, 2008
203. Csaicsich D, Russo-Schlaff N, Messerschmidt A, Weninger M, Pollak A and Aufricht C: Renal failure, comorbidity and mortality in preterm infants. *Wien Klin Wochenschr* 120: 153-157, 2008
204. Roghi A, Savonitto S, Cavallini C, et al.: Impact of acute renal failure following percutaneous coronary intervention on long-term mortality. *J Cardiovasc Med (Hagerstown)* 9: 375-381, 2008
205. Daher EF, Marques CN, Lima RS, et al.: Acute kidney injury in an infectious disease intensive care unit - an assessment of prognostic factors. *Swiss Med Wkly* 138: 128-133, 2008
206. Bagshaw SM, George C and Bellomo R: A comparison of the RIFLE and AKIN criteria for acute kidney injury in critically ill patients. *Nephrol Dial Transplant* 23: 1569-1574, 2008
207. Mittalhenkle A, Stehman-Breen CO, Shlipak MG, et al.: Cardiovascular risk factors and incident acute renal failure in older adults: the cardiovascular health study. *Clin J Am Soc Nephrol* 3: 450-456, 2008
208. Schetz M, Vanhorebeek I, Wouters PJ, Wilmer A and Van den Berghe G: Tight blood glucose control is renoprotective in critically ill patients. *J Am Soc Nephrol* 19: 571-578, 2008
209. Dasta JF, Kane-Gill SL, Durtschi AJ, Pathak DS and Kellum JA: Costs and outcomes of acute kidney injury (AKI) following cardiac surgery. *Nephrol Dial Transplant* 23: 1970-1974, 2008
210. Karkouti K, Wijeyesundera DN and Beattie WS: Risk associated with preoperative anemia in cardiac surgery: a multicenter cohort study. *Circulation* 117: 478-484, 2008
211. Covic A, Schiller A, Mardare NG, et al.: The impact of acute kidney injury on short-term survival in an Eastern European population with stroke. *Nephrol Dial Transplant* 23: 2228-2234, 2008
212. Bagshaw SM, George C, Dinu I and Bellomo R: A multi-centre evaluation of the RIFLE criteria for early acute kidney injury in critically ill patients. *Nephrol Dial Transplant* 23: 1203-1210, 2008
213. From AM, Bartholmai BJ, Williams AW, Cha SS, Pflueger A and McDonald FS: Sodium bicarbonate is associated with an increased incidence of contrast nephropathy: a retrospective cohort study of 7977 patients at mayo clinic. *Clin J Am Soc Nephrol* 3: 10-18, 2008
214. Washburn KK, Zappitelli M, Arian AA, et al.: Urinary interleukin-18 is an acute kidney injury biomarker in critically ill children. *Nephrol Dial Transplant* 23: 566-572, 2008
215. Iglesias JI, DePalma L, Hom D, Antoniotti M, Ayoub S and Levine JS: Predictors of mortality in adult patients with congestive heart failure receiving nesiritide--retrospective analysis showing a potential adverse interaction between nesiritide and acute renal dysfunction. *Nephrol Dial Transplant* 23: 144-153, 2008
216. Lopez-Herce J, Santiago MJ, Sanchez C, Mencia S, Carrillo A and Vigil D: Risk factors for gastrointestinal complications in critically ill children with transpyloric enteral nutrition. *Eur J Clin Nutr* 62: 395-400, 2008
217. Kheterpal S, Tremper KK, Englesbe MJ, et al.: Predictors of postoperative acute renal failure after noncardiac surgery in patients with previously normal renal function. *Anesthesiology* 107: 892-902, 2007
218. Perez Valdivieso JR, Bes-Rastrollo M, Monedero P, De Irala J and Lavilla FJ: Karnofsky performance score in acute renal failure as a predictor of short-term survival. *Nephrology (Carlton)* 12: 533-538, 2007
219. Eachempati SR, Wang JC, Hydo LJ, Shou J and Barie PS: Acute renal failure in critically ill surgical patients: persistent lethality despite new modes of renal replacement therapy. *J Trauma* 63: 987-993, 2007

220. Liu KD, Glidden DV, Eisner MD, et al.: Predictive and pathogenetic value of plasma biomarkers for acute kidney injury in patients with acute lung injury. *Crit Care Med* 35: 2755-2761, 2007
221. Thakar CV, Worley S, Arrigain S, Yared JP and Paganini EP: Improved survival in acute kidney injury after cardiac surgery. *Am J Kidney Dis* 50: 703-711, 2007
222. Bouzas-Mosquera A, Vazquez-Rodriguez JM, Calvino-Santos R, et al.: [Contrast-induced nephropathy and acute renal failure following emergent cardiac catheterization: incidence, risk factors and prognosis]. *Rev Esp Cardiol* 60: 1026-1034, 2007
223. Landoni G, Bove T, Crivellari M, et al.: Acute renal failure after isolated CABG surgery: six years of experience. *Minerva Anesthesiol* 73: 559-565, 2007
224. Pedersen KR, Povlsen JV, Christensen S, et al.: Risk factors for acute renal failure requiring dialysis after surgery for congenital heart disease in children. *Acta Anaesthesiol Scand* 51: 1344-1349, 2007
225. Swaminathan M, Shaw AD, Phillips-Bute BG, et al.: Trends in acute renal failure associated with coronary artery bypass graft surgery in the United States. *Crit Care Med* 35: 2286-2291, 2007
226. Del Duca D, Iqbal S, Rahme E, Goldberg P and de Varennes B: Renal failure after cardiac surgery: timing of cardiac catheterization and other perioperative risk factors. *Ann Thorac Surg* 84: 1264-1271, 2007
227. Chawla LS, Seneff MG, Nelson DR, et al.: Elevated plasma concentrations of IL-6 and elevated APACHE II score predict acute kidney injury in patients with severe sepsis. *Clin J Am Soc Nephrol* 2: 22-30, 2007
228. Cruz DN, Bolgan I, Perazella MA, et al.: North East Italian Prospective Hospital Renal Outcome Survey on Acute Kidney Injury (NEiPHROS-AKI): targeting the problem with the RIFLE Criteria. *Clin J Am Soc Nephrol* 2: 418-425, 2007
229. Zappitelli M, Washburn KK, Arikan AA, et al.: Urine neutrophil gelatinase-associated lipocalin is an early marker of acute kidney injury in critically ill children: a prospective cohort study. *Crit Care* 11: R84, 2007
230. Doddakula K, Al-Sarraf N, Gately K, et al.: Predictors of acute renal failure requiring renal replacement therapy post cardiac surgery in patients with preoperatively normal renal function. *Interact Cardiovasc Thorac Surg* 6: 314-318, 2007
231. Di Bella I, Da Col U, Ciampichini R, et al.: [Validation of a new scoring system to predict the risk of postoperative acute renal failure in cardiac surgery]. *G Ital Cardiol (Rome)* 8: 306-310, 2007
232. Sizzi O, Rossetti A, Malzoni M, et al.: Italian multicenter study on complications of laparoscopic myomectomy. *J Minim Invasive Gynecol* 14: 453-462, 2007
233. Palomba H, de Castro I, Neto AL, Lage S and Yu L: Acute kidney injury prediction following elective cardiac surgery: AKICS Score. *Kidney Int* 72: 624-631, 2007
234. Ostermann M and Chang RW: Acute kidney injury in the intensive care unit according to RIFLE. *Crit Care Med* 35: 1837-1843; quiz 1852, 2007
235. Brandt MM, Falvo AJ, Rubinfeld IS, Blyden D, Durrani NK and Horst HM: Renal dysfunction in trauma: even a little costs a lot. *J Trauma* 62: 1362-1364, 2007
236. Prescott GJ, Metcalfe W, Baharani J, et al.: A prospective national study of acute renal failure treated with RRT: incidence, aetiology and outcomes. *Nephrol Dial Transplant* 22: 2513-2519, 2007
237. Newell MA, Bard MR, Goettler CE, et al.: Body mass index and outcomes in critically injured blunt trauma patients: weighing the impact. *J Am Coll Surg* 204: 1056-1061; discussion 1062-1054, 2007
238. Thombs BD, Singh VA, Halonen J, Diallo A and Milner SM: The effects of preexisting medical comorbidities on mortality and length of hospital stay in acute burn injury: evidence from a national sample of 31,338 adult patients. *Ann Surg* 245: 629-634, 2007
239. Akcan-Arikan A, Zappitelli M, Loftis LL, Washburn KK, Jefferson LS and Goldstein SL: Modified RIFLE criteria in critically ill children with acute kidney injury. *Kidney Int* 71: 1028-1035, 2007

240. Ali T, Khan I, Simpson W, et al.: Incidence and outcomes in acute kidney injury: a comprehensive population-based study. *J Am Soc Nephrol* 18: 1292-1298, 2007
241. Feldman DN, Minutello RM, Gade CL and Wong SC: Outcomes following immediate (ad hoc) versus staged percutaneous coronary interventions (report from the 2000 to 2001 New York State Angioplasty Registry). *Am J Cardiol* 99: 446-449, 2007
242. Hingorani S, Guthrie KA, Schoch G, Weiss NS and McDonald GB: Chronic kidney disease in long-term survivors of hematopoietic cell transplant. *Bone Marrow Transplant* 39: 223-229, 2007
243. Chittineni H, Miyawaki N, Gulipelli S and Fishbane S: Risk for acute renal failure in patients hospitalized for decompensated congestive heart failure. *Am J Nephrol* 27: 55-62, 2007
244. Bailey D, Phan V, Litalien C, et al.: Risk factors of acute renal failure in critically ill children: A prospective descriptive epidemiological study. *Pediatr Crit Care Med* 8: 29-35, 2007
245. Sakr Y, Payen D, Reinhart K, et al.: Effects of hydroxyethyl starch administration on renal function in critically ill patients. *Br J Anaesth* 98: 216-224, 2007
246. Banyasz I, Bokodi G, Vasarhelyi B, et al.: Genetic polymorphisms for vascular endothelial growth factor in perinatal complications. *Eur Cytokine Netw* 17: 266-270, 2006
247. Prakash J, Murthy AS, Vohra R, Rajak M and Mathur SK: Acute renal failure in the intensive care unit. *J Assoc Physicians India* 54: 784-788, 2006
248. Charytan DM and Marulka S: Relationship of aortic atherosclerosis to acute renal failure following cardiac surgery. *J Nephrol* 19: 628-633, 2006
249. Plurad D, Brown C, Chan L, Demetriades D and Rhee P: Emergency department hypotension is not an independent risk factor for post-traumatic acute renal dysfunction. *J Trauma* 61: 1120-1127; discussion 1127-1128, 2006
250. Boyle JM, Moualla S, Arrigain S, et al.: Risks and outcomes of acute kidney injury requiring dialysis after cardiac transplantation. *Am J Kidney Dis* 48: 787-796, 2006
251. Schneider V, Levesque LE, Zhang B, Hutchinson T and Brophy JM: Association of selective and conventional nonsteroidal antiinflammatory drugs with acute renal failure: A population-based, nested case-control analysis. *Am J Epidemiol* 164: 881-889, 2006
252. Hein OV, Birnbaum J, Wernecke KD, Konertz W, Jain U and Spies C: Three-year survival after four major post-cardiac operative complications. *Crit Care Med* 34: 2729-2737, 2006
253. Sharma SK, McCauley J, Cottam D, et al.: Acute changes in renal function after laparoscopic gastric surgery for morbid obesity. *Surg Obes Relat Dis* 2: 389-392, 2006
254. Vachvanichsanong P, Dissaneewate P, Lim A and McNeil E: Childhood acute renal failure: 22-year experience in a university hospital in southern Thailand. *Pediatrics* 118: e786-791, 2006
255. Karkouti K, Yau TM, Riazi S, et al.: Determinants of complications with recombinant factor VIIa for refractory blood loss in cardiac surgery. *Can J Anaesth* 53: 802-809, 2006
256. Mahajan S, Tiwari S, Bhowmik D, Agarwal SK, Tiwari SC and Dash SC: Factors affecting the outcome of acute renal failure among the elderly population in India: a hospital based study. *Int Urol Nephrol* 38: 391-396, 2006
257. Heringlake M, Knappe M, Vargas Hein O, et al.: Renal dysfunction according to the ADQI-RIFLE system and clinical practice patterns after cardiac surgery in Germany. *Minerva Anesthesiol* 72: 645-654, 2006
258. Ahlstrom A, Kuitunen A, Peltonen S, et al.: Comparison of 2 acute renal failure severity scores to general scoring systems in the critically ill. *Am J Kidney Dis* 48: 262-268, 2006
259. Mathur NB, Agarwal HS and Maria A: Acute renal failure in neonatal sepsis. *Indian J Pediatr* 73: 499-502, 2006
260. Black SA, Brooks MJ, Naidoo MN and Wolfe JH: Assessing the impact of renal impairment on outcome after arterial intervention: a prospective review of 1,559 patients. *Eur J Vasc Endovasc Surg* 32: 300-304, 2006

261. Uchino S, Bellomo R, Goldsmith D, Bates S and Ronco C: An assessment of the RIFLE criteria for acute renal failure in hospitalized patients. *Crit Care Med* 34: 1913-1917, 2006
262. Hoste EA, Clermont G, Kersten A, et al.: RIFLE criteria for acute kidney injury are associated with hospital mortality in critically ill patients: a cohort analysis. *Crit Care* 10: R73, 2006
263. Junge G, Schewior LV, Kohler S, et al.: Acute renal failure after liver transplantation: incidence, etiology, therapy, and outcome. *Transplant Proc* 38: 723-724, 2006
264. Wald R, Waikar SS, Liangos O, Pereira BJ, Chertow GM and Jaber BL: Acute renal failure after endovascular vs open repair of abdominal aortic aneurysm. *J Vasc Surg* 43: 460-466; discussion 466, 2006
265. Xue JL, Daniels F, Star RA, et al.: Incidence and mortality of acute renal failure in Medicare beneficiaries, 1992 to 2001. *J Am Soc Nephrol* 17: 1135-1142, 2006
266. Chan V, Jamieson WR, Chan F and Germann E: Valve replacement surgery complicated by acute renal failure--predictors of early mortality. *J Card Surg* 21: 139-143; discussion 144-135, 2006
267. Noyez L, Plesiewicz I and Verheugt FW: Estimated creatinine clearance instead of plasma creatinine level as prognostic test for postoperative renal function in patients undergoing coronary artery bypass surgery. *Eur J Cardiothorac Surg* 29: 461-465, 2006
268. Beaver TM, Winterstein AG, Shuster JJ, et al.: Effectiveness of nesiritide on dialysis or all-cause mortality in patients undergoing cardiothoracic surgery. *Clin Cardiol* 29: 18-24, 2006
269. Wyatt CM, Arons RR, Klotman PE and Klotman ME: Acute renal failure in hospitalized patients with HIV: risk factors and impact on in-hospital mortality. *AIDS* 20: 561-565, 2006
270. Kuitunen A, Vento A, Suojäranta-Ylinen R and Pettilä V: Acute renal failure after cardiac surgery: evaluation of the RIFLE classification. *Ann Thorac Surg* 81: 542-546, 2006
271. Wijesundera DN, Karkouti K, Beattie WS, Rao V and Ivanov J: Improving the identification of patients at risk of postoperative renal failure after cardiac surgery. *Anesthesiology* 104: 65-72, 2006
272. Landoni G, Zangrillo A, Franco A, et al.: Long-term outcome of patients who require renal replacement therapy after cardiac surgery. *Eur J Anaesthesiol* 23: 17-22, 2006
273. Bah AO, Kaba ML, Diallo MB, et al.: [Renal diseases--morbidity and mortality in Nephrology Service, National Hospital Donka]. *Mali Med* 21: 42-46, 2006
274. Gamborgi GP, Metcalf EB and Barros EJ: Acute renal failure provoked by toxin from caterpillars of the species *Lonomia obliqua*. *Toxicon* 47: 68-74, 2006
275. Conen D, Buerkle G, Perruchoud AP, Buettner HJ and Mueller C: Hypertension is an independent risk factor for contrast nephropathy after percutaneous coronary intervention. *Int J Cardiol* 110: 237-241, 2006
276. Bahar I, Akgul A, Ozatik MA, et al.: Acute renal failure following open heart surgery: risk factors and prognosis. *Perfusion* 20: 317-322, 2005
277. Ranucci M, Romitti F, Isgro G, et al.: Oxygen delivery during cardiopulmonary bypass and acute renal failure after coronary operations. *Ann Thorac Surg* 80: 2213-2220, 2005
278. Bagshaw SM, Laupland KB, Doig CJ, et al.: Prognosis for long-term survival and renal recovery in critically ill patients with severe acute renal failure: a population-based study. *Crit Care* 9: R700-709, 2005
279. Ciesla DJ, Moore EE, Johnson JL, Burch JM, Cothren CC and Sauaia A: The role of the lung in postinjury multiple organ failure. *Surgery* 138: 749-757; discussion 757-748, 2005
280. Cataldi L, Leone R, Moretti U, et al.: Potential risk factors for the development of acute renal failure in preterm newborn infants: a case-control study. *Arch Dis Child Fetal Neonatal Ed* 90: F514-519, 2005
281. Kincaid EH, Ashburn DA, Hoyle JR, Reichert MG, Hammon JW and Kon ND: Does the combination of aprotinin and angiotensin-converting enzyme inhibitor cause renal failure after cardiac surgery? *Ann Thorac Surg* 80: 1388-1393; discussion 1393, 2005
282. Baskin E, Saygili A, Harmanci K, et al.: Acute renal failure and mortality after open-heart surgery in infants. *Ren Fail* 27: 557-560, 2005

283. Hollenbeck BK, Miller DC, Taub D, et al.: Identifying risk factors for potentially avoidable complications following radical cystectomy. *J Urol* 174: 1231-1237; discussion 1237, 2005
284. Carter R, 3rd, Chevront SN, Williams JO, et al.: Epidemiology of hospitalizations and deaths from heat illness in soldiers. *Med Sci Sports Exerc* 37: 1338-1344, 2005
285. Uchino S, Kellum JA, Bellomo R, et al.: Acute renal failure in critically ill patients: a multinational, multicenter study. *JAMA* 294: 813-818, 2005
286. Kubal C, Srinivasan AK, Grayson AD, Fabri BM and Chalmers JA: Effect of risk-adjusted diabetes on mortality and morbidity after coronary artery bypass surgery. *Ann Thorac Surg* 79: 1570-1576, 2005
287. Franceschini N, Napravnik S, Eron JJ, Jr., Szczech LA and Finn WF: Incidence and etiology of acute renal failure among ambulatory HIV-infected patients. *Kidney Int* 67: 1526-1531, 2005
288. Huerta C, Castellsague J, Varas-Lorenzo C and Garcia Rodriguez LA: Nonsteroidal anti-inflammatory drugs and risk of ARF in the general population. *Am J Kidney Dis* 45: 531-539, 2005
289. Gaudino M, Luciani N, Giungi S, et al.: Different profiles of patients who require dialysis after cardiac surgery. *Ann Thorac Surg* 79: 825-829; author reply 829-830, 2005
290. Conlon PJ, Crowley J, Stack R, et al.: Renal artery stenosis is not associated with the development of acute renal failure following coronary artery bypass grafting. *Ren Fail* 27: 81-86, 2005
291. Thakar CV, Worley S, Arrigain S, Yared JP and Paganini EP: Influence of renal dysfunction on mortality after cardiac surgery: modifying effect of preoperative renal function. *Kidney Int* 67: 1112-1119, 2005
292. Ostermann ME and Chang RW: Prognosis of acute renal failure: an evaluation of proposed consensus criteria. *Intensive Care Med* 31: 250-256, 2005
293. Karkouti K, Beattie WS, Wijeyesundera DN, et al.: Hemodilution during cardiopulmonary bypass is an independent risk factor for acute renal failure in adult cardiac surgery. *J Thorac Cardiovasc Surg* 129: 391-400, 2005
294. Chu KH, Tsang WK, Tang CS, et al.: Acute renal impairment in coronavirus-associated severe acute respiratory syndrome. *Kidney Int* 67: 698-705, 2005
295. Bell M, Liljestam E, Granath F, Fryckstedt J, Ekbom A and Martling CR: Optimal follow-up time after continuous renal replacement therapy in actual renal failure patients stratified with the RIFLE criteria. *Nephrol Dial Transplant* 20: 354-360, 2005
296. Khilji SA and Khan AH: Acute renal failure after cardiopulmonary bypass surgery. *J Ayub Med Coll Abbottabad* 16: 25-28, 2004
297. Miraoui W, Mebazaa M, Frikha N and Ben Ammar MS: [Isolated acute renal failure is not associated to an increase in mortality of patients in intensive care units]. *Tunis Med* 82: 996-1000, 2004
298. Wyatt CM and Arons RR: The burden of acute renal failure in nonrenal solid organ transplantation. *Transplantation* 78: 1351-1355, 2004
299. Srinivasan AK, Grayson AD and Fabri BM: On-pump versus off-pump coronary artery bypass grafting in diabetic patients: a propensity score analysis. *Ann Thorac Surg* 78: 1604-1609, 2004
300. Mariani MA, D'Alfonso A and Grandjean JG: Total arterial off-pump coronary surgery: time to change our habits? *Ann Thorac Surg* 78: 1591-1597, 2004
301. Bove T, Calabro MG, Landoni G, et al.: The incidence and risk of acute renal failure after cardiac surgery. *J Cardiothorac Vasc Anesth* 18: 442-445, 2004
302. Collins JS, Evangelista A, Nienaber CA, et al.: Differences in clinical presentation, management, and outcomes of acute type a aortic dissection in patients with and without previous cardiac surgery. *Circulation* 110: I1237-242, 2004
303. Agras PI, Tarcan A, Baskin E, Cengiz N, Gurakan B and Saatci U: Acute renal failure in the neonatal period. *Ren Fail* 26: 305-309, 2004

304. Moran SL, Salgado CJ and Serletti JM: Free tissue transfer in patients with renal disease. *Plast Reconstr Surg* 113: 2006-2011, 2004
305. Brown CV, Rhee P, Chan L, Evans K, Demetriades D and Velmahos GC: Preventing renal failure in patients with rhabdomyolysis: do bicarbonate and mannitol make a difference? *J Trauma* 56: 1191-1196, 2004
306. Paramesh AS, Roayaie S, Doan Y, et al.: Post-liver transplant acute renal failure: factors predicting development of end-stage renal disease. *Clin Transplant* 18: 94-99, 2004
307. Mueller C, Buerkle G, Perruchoud AP and Buettner HJ: Female sex and risk of contrast nephropathy after percutaneous coronary intervention. *Can J Cardiol* 20: 505-509, 2004
308. Stallwood MI, Grayson AD, Mills K and Scawn ND: Acute renal failure in coronary artery bypass surgery: independent effect of cardiopulmonary bypass. *Ann Thorac Surg* 77: 968-972, 2004
309. Esteban A, Anzueto A, Frutos-Vivar F, et al.: Outcome of older patients receiving mechanical ventilation. *Intensive Care Med* 30: 639-646, 2004
310. Michael M, Kuehnle I and Goldstein SL: Fluid overload and acute renal failure in pediatric stem cell transplant patients. *Pediatr Nephrol* 19: 91-95, 2004
